# Supplementary material for: Insights from QM/MM-ONIOM calculations: the TADF phenomenon of phenanthro[9,10-d]imidazole-anthraquinone in the solid state
Source: Royal Society of Chemistry journal article supplement (doi:10.1039/d1cp00578b), 2021-01-01
Supplement: d1cp00578b1.pdf [file d1cp00578b1.pdf]

### *Supplementary Information for*

## **Insights from QM/MM-ONIOM calculations: the TADF phenomenon of phenanthro[9,10-*d*]imidazole–anthraquinone in solid state**

Huixue Li\*, Xiaofeng Wang, Yuancheng Zhu, Kun Yuan, Lingling Lv, Zhifeng Li\*

School of Chemical Engineering and Technology, Tianshui Normal University, Tianshui, Gansu  
741001, China

### **Table of contents**

|                                                                                                                                                                                                                                                         | <u>page</u> |
|---------------------------------------------------------------------------------------------------------------------------------------------------------------------------------------------------------------------------------------------------------|-------------|
| <b>Figure S1.</b> Bond length of the studied molecule PIPAQ in toluene by B3LYP/6-31G(d, p).                                                                                                                                                            | S2          |
| <b>Figure S2.</b> Bond length of the studied molecule PIPAQ in cluster by ONIOM (B3LYP/6-31G(d):UFF), the low layer omitted.                                                                                                                            | S2          |
| <b>Figure S3.</b> Three-dimensional diagram of $k_{isc}$ and SOC and the energy difference $\Delta E_{S_1-T_1}$                                                                                                                                         | S3          |
| <b>Table S1.</b> The frequencies of the title compound according to QM and ONIOM calculations                                                                                                                                                           | S4          |
| <b>Table S2.</b> Absorption and emission wavelength/nm of the title compound according to TDDFT calculations                                                                                                                                            | S8          |
| <b>Table S3.</b> Vertical excitation energies ( $E_{\perp}$ , eV), wavelength (nm) and singly occupied orbitals involved in the $S_0 \rightarrow S_n$ or $T_n$ electronic transitions in vacuum, solution, and cluster, which are computed by TD-B3LYP. | S8          |
| <b>Table S4.</b> Spin-orbital coupling (SOC)/ $\text{cm}^{-1}$ , intersystem crossing rate ( $k_{isc}$ ), and reverse intersystem crossing rate ( $k_{risc}$ ) of the title compound at the $S_1$ and $T_1$ minima                                      | S8          |
| <b>Table S5.</b> The reorganization energy ( $\text{cm}^{-1}$ ) between $S_1$ and $T_1$ minima vs each frequency of the title compound by NMA method with <b>internal</b> coordinate                                                                    | S9          |
| <b>Table S6.</b> The reorganization energy ( $\text{cm}^{-1}$ ) between $S_1$ and $T_1$ minima vs each frequency of the title compound by NMA method with <b>Cartesian</b> coordinate                                                                   | S13         |
| <b>Table S7.</b> The reorganization energy ( $\text{cm}^{-1}$ ) between $S_0$ and $S_1$ minima vs each frequency of the title compound by NMA method with internal coordinate                                                                           | S17         |

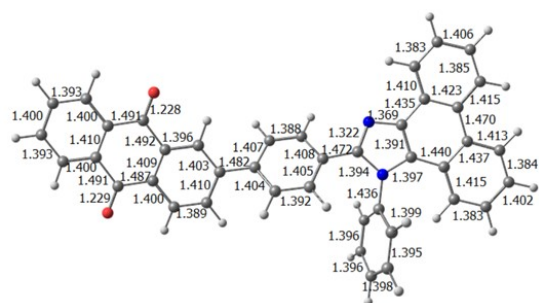

a: Optimizatiad  $S_0$  state in toluene

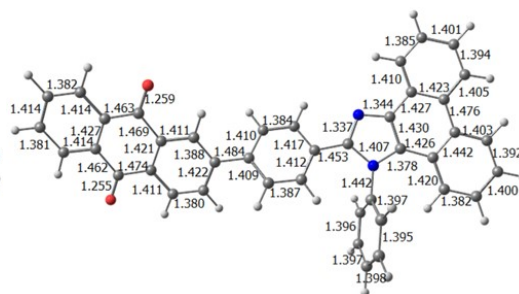

b: Optimizatiad  $S_1$  state in toluene

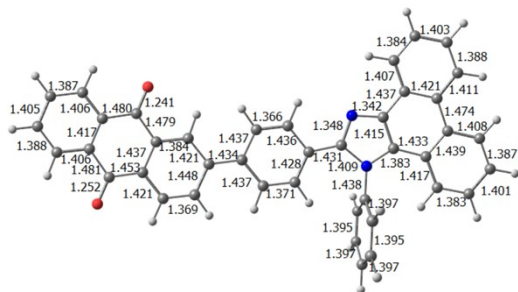

c: Optimizatiad  $T_1$  state in toluene

Figure S1. Bond length of the studied molecule PIPAQ in toluene by B3LYP/6-31G(d, p).

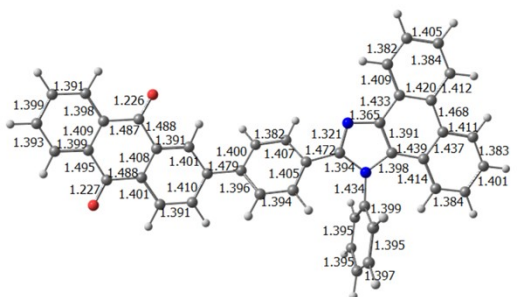

a: Optimizatiad  $S_0$  state in cluster

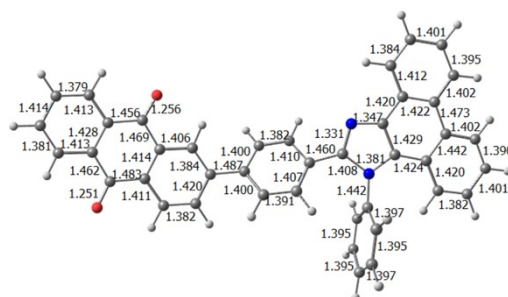

b: Optimizatiad  $S_1$  state in cluster

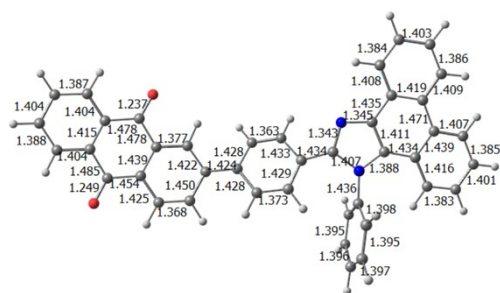

c: Optimizatiad  $T_0$  state in cluster

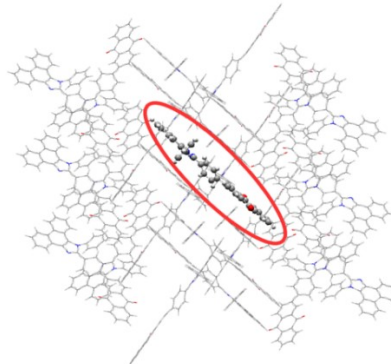

d: the ONIOM model

Figure S2. Bond length of the studied molecule PIPAQ in cluster (a, b, and c) by ONIOM (B3LYP/6-31G(d):UFF), the low layer omitted.

ONIOM model (d): the centered molecule is treated as a high layer and the surrounding molecules are fixed as a low layer.

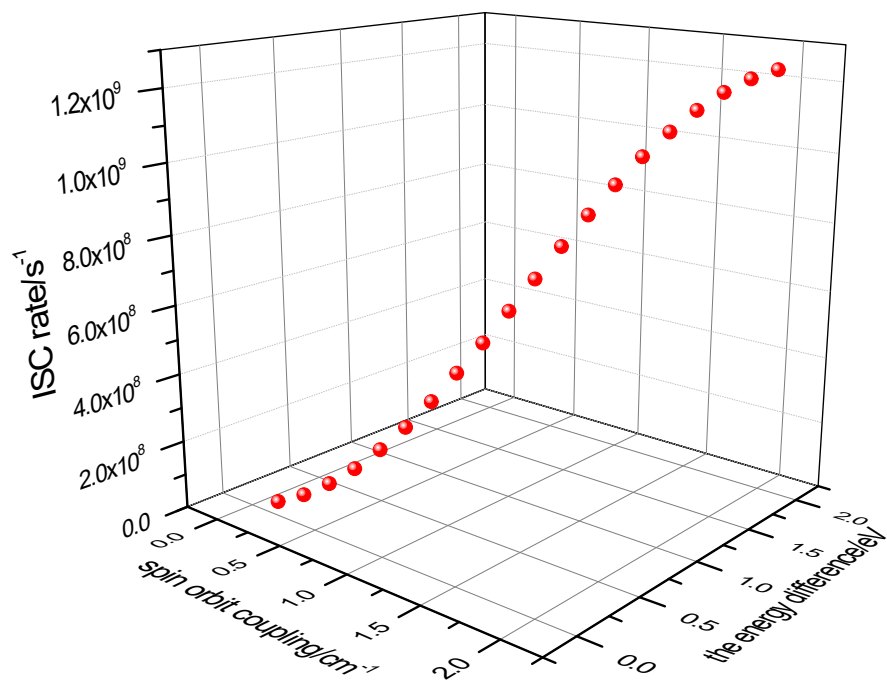

Figure S3. Three-dimensional diagram of  $k_{isc}$  and SOC and the energy difference  $\Delta E_{S1-T1}$

**Table S1.** The frequencies of the title compound according to QM and ONIOM calculations

| .               | In vacuum            |                      |                      | In toluene           |                      |                      | In cluster           |                      |                      |
|-----------------|----------------------|----------------------|----------------------|----------------------|----------------------|----------------------|----------------------|----------------------|----------------------|
|                 | S <sub>0</sub> state | S <sub>1</sub> state | T <sub>1</sub> state | S <sub>0</sub> state | S <sub>1</sub> state | T <sub>1</sub> state | S <sub>0</sub> state | S <sub>1</sub> state | T <sub>1</sub> state |
| v <sub>1</sub>  | 7.5                  | 3.3                  | 4.1                  | 12.3                 | 6.0                  | 8.6                  | 27.0                 | 26.6                 | 27.2                 |
| v <sub>2</sub>  | 13.2                 | 12.4                 | 11.9                 | 15.3                 | 15.0                 | 14.6                 | 32.9                 | 33.2                 | 33.6                 |
| v <sub>3</sub>  | 20.3                 | 20.3                 | 20.3                 | 21.4                 | 22.3                 | 24.4                 | 42.3                 | 41.7                 | 42.2                 |
| v <sub>4</sub>  | 21.5                 | 22.8                 | 24.1                 | 23.8                 | 26.0                 | 29.1                 | 48.7                 | 48.1                 | 47.8                 |
| v <sub>5</sub>  | 35.9                 | 39.0                 | 30.6                 | 37.4                 | 40.7                 | 32.2                 | 57.2                 | 57.9                 | 57.2                 |
| v <sub>6</sub>  | 41.4                 | 41.5                 | 35.0                 | 43.9                 | 43.1                 | 38.6                 | 58.6                 | 59.0                 | 60.6                 |
| v <sub>7</sub>  | 54.6                 | 57.6                 | 53.8                 | 56.5                 | 55.5                 | 53.7                 | 64.3                 | 65.0                 | 64.0                 |
| v <sub>8</sub>  | 60.3                 | 59.1                 | 56.0                 | 60.2                 | 61.7                 | 59.5                 | 68.1                 | 68.4                 | 69.1                 |
| v <sub>9</sub>  | 66.5                 | 68.8                 | 67.6                 | 68.6                 | 70.6                 | 71.2                 | 72.2                 | 72.7                 | 72.0                 |
| v <sub>10</sub> | 74.6                 | 77.2                 | 85.1                 | 74.7                 | 79.8                 | 84.1                 | 80.6                 | 76.8                 | 79.9                 |
| v <sub>11</sub> | 90.5                 | 86.9                 | 87.0                 | 92.6                 | 91.1                 | 92.0                 | 84.5                 | 83.8                 | 82.5                 |
| v <sub>12</sub> | 95.5                 | 95.1                 | 93.1                 | 96.6                 | 96.2                 | 93.9                 | 86.9                 | 87.9                 | 87.8                 |
| v <sub>13</sub> | 107.9                | 109.3                | 98.5                 | 108.6                | 109.4                | 101.2                | 89.4                 | 90.7                 | 90.8                 |
| v <sub>14</sub> | 123.5                | 125.6                | 128.2                | 124.0                | 126.5                | 128.6                | 94.1                 | 95.2                 | 94.0                 |
| v <sub>15</sub> | 125.2                | 134.4                | 128.3                | 125.6                | 133.3                | 135.2                | 99.0                 | 102.5                | 101.0                |
| v <sub>16</sub> | 146.9                | 158.3                | 147.1                | 147.3                | 158.1                | 153.7                | 106.8                | 104.6                | 106.3                |
| v <sub>17</sub> | 160.8                | 165.5                | 160.7                | 161.1                | 166.1                | 164.7                | 132.4                | 132.6                | 121.0                |
| v <sub>18</sub> | 172.2                | 175.0                | 175.6                | 173.0                | 175.4                | 177.1                | 136.1                | 136.7                | 136.2                |
| v <sub>19</sub> | 180.2                | 178.2                | 187.6                | 180.2                | 181.6                | 187.6                | 138.5                | 139.4                | 138.8                |
| v <sub>20</sub> | 212.1                | 213.6                | 196.5                | 213.1                | 212.9                | 201.6                | 142.2                | 148.9                | 143.4                |
| v <sub>21</sub> | 228.3                | 225.3                | 228.4                | 228.1                | 226.6                | 228.3                | 158.9                | 170.8                | 164.6                |
| v <sub>22</sub> | 230.0                | 232.5                | 238.2                | 230.1                | 235.5                | 239.8                | 172.2                | 178.2                | 167.5                |
| v <sub>23</sub> | 256.0                | 254.0                | 241.4                | 256.8                | 254.2                | 244.9                | 188.7                | 182.9                | 184.2                |
| v <sub>24</sub> | 262.0                | 261.7                | 264.8                | 262.0                | 263.0                | 265.4                | 191.1                | 195.6                | 191.1                |
| v <sub>25</sub> | 269.8                | 266.9                | 269.3                | 270.6                | 268.5                | 270.6                | 203.0                | 206.4                | 205.3                |
| v <sub>26</sub> | 290.6                | 281.0                | 276.7                | 291.5                | 281.8                | 281.9                | 230.2                | 228.9                | 230.1                |
| v <sub>27</sub> | 297.0                | 292.7                | 293.7                | 298.7                | 294.6                | 298.1                | 234.6                | 233.6                | 237.5                |
| v <sub>28</sub> | 317.6                | 319.7                | 306.9                | 317.4                | 321.1                | 311.2                | 241.4                | 241.3                | 242.4                |
| v <sub>29</sub> | 333.3                | 336.8                | 316.4                | 333.7                | 338.3                | 320.6                | 264.6                | 264.9                | 256.0                |
| v <sub>30</sub> | 375.5                | 372.6                | 361.7                | 376.6                | 373.6                | 365.8                | 272.3                | 271.7                | 273.0                |
| v <sub>31</sub> | 386.7                | 381.2                | 385.1                | 387.4                | 382.4                | 385.7                | 277.8                | 273.8                | 277.8                |
| v <sub>32</sub> | 401.6                | 400.7                | 407.4                | 401.9                | 403.5                | 406.3                | 305.8                | 296.4                | 299.7                |
| v <sub>33</sub> | 409.9                | 407.0                | 408.2                | 409.9                | 406.7                | 406.8                | 309.2                | 305.9                | 308.2                |
| v <sub>34</sub> | 413.6                | 409.5                | 410.7                | 413.5                | 409.1                | 413.4                | 325.7                | 327.5                | 317.5                |
| v <sub>35</sub> | 415.9                | 416.1                | 414.4                | 416.5                | 416.6                | 415.6                | 342.1                | 347.5                | 330.0                |
| v <sub>36</sub> | 421.2                | 420.7                | 419.9                | 421.6                | 421.5                | 421.6                | 382.1                | 378.4                | 368.7                |
| v <sub>37</sub> | 422.7                | 421.7                | 424.3                | 423.6                | 423.2                | 424.3                | 389.2                | 383.5                | 386.8                |
| v <sub>38</sub> | 440.1                | 431.6                | 430.6                | 440.7                | 433.0                | 433.8                | 410.6                | 408.2                | 407.3                |
| v <sub>39</sub> | 446.1                | 445.0                | 438.2                | 446.6                | 445.6                | 438.8                | 414.1                | 417.3                | 413.5                |
| v <sub>40</sub> | 451.5                | 448.6                | 446.1                | 451.3                | 450.1                | 446.7                | 419.0                | 421.5                | 416.3                |
| v <sub>41</sub> | 455.0                | 452.9                | 454.7                | 455.2                | 453.3                | 455.2                | 424.4                | 424.8                | 422.0                |
| v <sub>42</sub> | 462.6                | 464.5                | 454.8                | 462.7                | 465.0                | 459.8                | 429.5                | 427.3                | 428.6                |
| v <sub>43</sub> | 466.7                | 472.3                | 461.0                | 466.9                | 475.0                | 463.7                | 444.2                | 442.3                | 436.9                |
| v <sub>44</sub> | 479.1                | 476.3                | 471.8                | 479.9                | 475.7                | 476.1                | 450.5                | 446.3                | 445.3                |
| v <sub>45</sub> | 487.7                | 490.4                | 483.5                | 488.6                | 489.6                | 485.7                | 454.6                | 452.0                | 449.1                |
| v <sub>46</sub> | 498.9                | 499.4                | 484.6                | 499.5                | 500.3                | 493.2                | 460.7                | 458.0                | 458.7                |
| v <sub>47</sub> | 525.8                | 526.1                | 500.7                | 525.3                | 525.5                | 501.0                | 467.8                | 465.7                | 460.7                |
| v <sub>48</sub> | 536.1                | 530.7                | 535.0                | 537.1                | 530.6                | 534.7                | 472.1                | 474.2                | 464.1                |
| v <sub>49</sub> | 553.5                | 546.3                | 536.1                | 554.4                | 548.0                | 540.8                | 473.9                | 475.6                | 469.0                |

|      |        |        |       |        |        |        |       |       |       |
|------|--------|--------|-------|--------|--------|--------|-------|-------|-------|
| V50  | 559.2  | 558.3  | 550.3 | 558.8  | 559.0  | 552.9  | 487.6 | 479.9 | 484.7 |
| V51  | 574.8  | 558.7  | 560.6 | 575.5  | 559.8  | 561.6  | 492.2 | 495.7 | 491.2 |
| V52  | 585.8  | 572.1  | 568.9 | 586.6  | 572.0  | 567.7  | 502.3 | 501.9 | 503.3 |
| V53  | 630.4  | 621.3  | 626.0 | 629.9  | 622.2  | 627.0  | 535.1 | 530.5 | 515.2 |
| V54  | 631.2  | 631.0  | 628.6 | 630.5  | 630.7  | 629.1  | 547.0 | 539.1 | 537.0 |
| V55  | 646.7  | 638.8  | 629.6 | 646.0  | 638.4  | 629.6  | 557.9 | 548.5 | 551.9 |
| V56  | 650.0  | 643.6  | 638.1 | 649.8  | 643.9  | 639.0  | 563.8 | 561.9 | 560.8 |
| V57  | 653.2  | 646.9  | 640.3 | 652.5  | 646.6  | 641.8  | 581.6 | 566.0 | 562.5 |
| V58  | 672.3  | 663.5  | 646.0 | 671.8  | 662.7  | 645.9  | 601.3 | 591.5 | 576.5 |
| V59  | 680.1  | 670.2  | 670.1 | 680.1  | 670.2  | 670.5  | 632.5 | 623.2 | 629.8 |
| V60  | 687.2  | 685.3  | 682.1 | 687.0  | 684.9  | 682.7  | 634.8 | 634.4 | 630.9 |
| V61  | 688.9  | 690.7  | 682.8 | 688.4  | 691.4  | 690.8  | 650.3 | 643.5 | 633.3 |
| V62  | 702.6  | 702.0  | 690.1 | 702.2  | 701.7  | 693.9  | 653.8 | 647.1 | 635.6 |
| V63  | 705.2  | 703.9  | 694.2 | 705.5  | 703.8  | 695.2  | 661.2 | 656.2 | 642.8 |
| V64  | 706.0  | 705.2  | 704.2 | 707.8  | 705.8  | 703.9  | 673.9 | 663.8 | 649.3 |
| V65  | 714.9  | 712.6  | 708.2 | 716.2  | 715.4  | 712.2  | 682.7 | 672.1 | 670.9 |
| V66  | 723.2  | 716.9  | 716.5 | 725.4  | 718.8  | 716.3  | 689.7 | 687.7 | 683.9 |
| V67  | 729.3  | 724.6  | 717.1 | 729.7  | 725.8  | 718.1  | 694.2 | 696.1 | 691.7 |
| V68  | 732.2  | 727.1  | 722.2 | 732.1  | 726.9  | 723.6  | 707.4 | 704.7 | 695.9 |
| V69  | 736.7  | 732.4  | 722.2 | 736.9  | 728.9  | 724.4  | 707.9 | 707.8 | 700.2 |
| V70  | 738.2  | 742.2  | 732.1 | 739.4  | 741.1  | 732.0  | 709.6 | 709.7 | 706.4 |
| V71  | 755.7  | 756.4  | 740.0 | 755.8  | 755.8  | 746.4  | 723.2 | 714.5 | 716.8 |
| V72  | 759.9  | 768.0  | 743.3 | 760.5  | 766.6  | 747.3  | 730.8 | 726.0 | 719.7 |
| V73  | 767.4  | 773.9  | 767.4 | 770.6  | 778.2  | 772.2  | 732.6 | 730.2 | 726.5 |
| V74  | 780.8  | 778.0  | 778.2 | 783.3  | 781.4  | 780.1  | 735.0 | 731.3 | 727.0 |
| V75  | 788.1  | 785.3  | 780.1 | 788.5  | 788.5  | 788.1  | 740.0 | 742.3 | 729.7 |
| V76  | 793.7  | 785.8  | 787.5 | 794.6  | 788.9  | 788.5  | 745.0 | 747.3 | 741.0 |
| V77  | 809.0  | 787.7  | 788.2 | 810.7  | 790.0  | 792.6  | 760.3 | 759.8 | 751.0 |
| V78  | 815.0  | 808.2  | 791.0 | 814.9  | 806.3  | 797.7  | 768.5 | 774.9 | 752.0 |
| V79  | 819.5  | 821.7  | 807.9 | 819.3  | 821.8  | 806.5  | 773.0 | 778.2 | 775.4 |
| V80  | 838.0  | 838.1  | 815.8 | 837.9  | 838.9  | 818.9  | 783.2 | 783.6 | 781.5 |
| V81  | 849.0  | 841.7  | 818.5 | 853.0  | 841.2  | 819.8  | 794.0 | 787.1 | 790.0 |
| V82  | 856.7  | 849.4  | 825.8 | 859.8  | 849.3  | 830.2  | 804.3 | 790.8 | 792.7 |
| V83  | 861.2  | 857.8  | 834.4 | 861.0  | 862.3  | 846.5  | 810.8 | 793.1 | 800.4 |
| V84  | 866.5  | 876.9  | 860.9 | 869.9  | 876.2  | 861.9  | 817.2 | 811.2 | 807.9 |
| V85  | 879.3  | 878.6  | 868.1 | 882.8  | 883.9  | 873.4  | 823.4 | 824.8 | 813.2 |
| V86  | 884.2  | 881.3  | 872.1 | 885.8  | 888.2  | 887.6  | 842.6 | 841.8 | 821.3 |
| V87  | 922.0  | 892.2  | 884.5 | 924.6  | 896.2  | 912.4  | 862.1 | 845.5 | 826.8 |
| V88  | 930.8  | 925.2  | 914.9 | 937.4  | 933.1  | 913.2  | 865.8 | 862.6 | 834.2 |
| V89  | 936.6  | 942.3  | 940.2 | 940.4  | 941.6  | 944.0  | 872.1 | 873.9 | 863.9 |
| V90  | 948.0  | 944.6  | 941.6 | 946.9  | 949.2  | 949.6  | 882.3 | 882.5 | 864.1 |
| V91  | 948.8  | 953.3  | 944.7 | 954.1  | 950.5  | 951.9  | 887.6 | 883.0 | 875.7 |
| V92  | 956.7  | 957.9  | 946.2 | 957.0  | 964.1  | 953.0  | 922.8 | 893.0 | 893.3 |
| V93  | 967.0  | 967.7  | 952.9 | 971.1  | 966.8  | 960.4  | 935.2 | 926.4 | 912.2 |
| V94  | 971.4  | 972.8  | 959.2 | 972.3  | 976.8  | 964.0  | 946.4 | 941.4 | 934.2 |
| V95  | 973.0  | 975.0  | 962.6 | 973.4  | 977.4  | 967.6  | 948.1 | 942.9 | 945.3 |
| V96  | 974.2  | 976.6  | 976.0 | 978.2  | 979.3  | 980.3  | 950.5 | 950.4 | 946.9 |
| V97  | 975.5  | 979.7  | 983.7 | 982.0  | 985.5  | 987.1  | 957.8 | 956.2 | 952.5 |
| V98  | 987.6  | 984.2  | 985.6 | 986.7  | 986.0  | 991.6  | 959.0 | 962.1 | 959.4 |
| V99  | 988.5  | 986.1  | 986.7 | 992.3  | 987.6  | 992.8  | 974.6 | 973.5 | 962.3 |
| V100 | 993.4  | 989.6  | 990.7 | 995.4  | 994.4  | 994.6  | 978.2 | 974.9 | 965.3 |
| V101 | 996.2  | 998.4  | 992.7 | 996.3  | 1001.5 | 995.0  | 979.9 | 979.2 | 969.1 |
| V102 | 1000.5 | 998.6  | 997.8 | 1003.3 | 1005.5 | 1000.9 | 981.3 | 981.5 | 980.9 |
| V103 | 1001.3 | 1007.9 | 999.1 | 1007.0 | 1010.9 | 1002.7 | 982.3 | 984.4 | 984.7 |

|      |        |        |        |        |        |        |        |        |        |
|------|--------|--------|--------|--------|--------|--------|--------|--------|--------|
| V104 | 1012.9 | 1012.8 | 1004.3 | 1016.7 | 1014.2 | 1010.0 | 992.4  | 987.8  | 986.9  |
| V105 | 1017.9 | 1014.4 | 1009.8 | 1017.9 | 1017.3 | 1011.2 | 997.9  | 991.0  | 989.9  |
| V106 | 1021.3 | 1021.5 | 1010.3 | 1020.1 | 1020.2 | 1014.4 | 1000.3 | 993.7  | 991.7  |
| V107 | 1035.3 | 1032.6 | 1015.5 | 1034.3 | 1029.2 | 1015.2 | 1004.9 | 1008.2 | 1005.4 |
| V108 | 1052.3 | 1047.4 | 1019.4 | 1051.4 | 1047.1 | 1018.5 | 1012.4 | 1015.0 | 1006.8 |
| V109 | 1061.6 | 1050.4 | 1047.9 | 1061.8 | 1050.0 | 1047.0 | 1014.3 | 1023.3 | 1012.5 |
| V110 | 1068.2 | 1059.1 | 1057.8 | 1068.7 | 1058.1 | 1056.1 | 1019.4 | 1024.3 | 1015.9 |
| V111 | 1071.5 | 1071.2 | 1066.0 | 1070.9 | 1071.5 | 1066.9 | 1025.7 | 1026.2 | 1019.0 |
| V112 | 1077.2 | 1078.4 | 1074.0 | 1076.8 | 1078.7 | 1074.7 | 1050.5 | 1047.8 | 1025.2 |
| V113 | 1088.6 | 1087.8 | 1082.3 | 1088.1 | 1088.7 | 1083.3 | 1058.1 | 1056.1 | 1033.6 |
| V114 | 1106.8 | 1110.0 | 1104.6 | 1106.8 | 1111.8 | 1104.8 | 1072.6 | 1057.9 | 1055.0 |
| V115 | 1116.2 | 1119.9 | 1112.0 | 1116.8 | 1119.4 | 1111.4 | 1074.5 | 1070.2 | 1066.0 |
| V116 | 1130.8 | 1125.4 | 1114.8 | 1131.1 | 1126.9 | 1117.2 | 1078.9 | 1076.4 | 1073.6 |
| V117 | 1136.4 | 1130.9 | 1126.9 | 1136.3 | 1135.5 | 1132.1 | 1084.8 | 1085.3 | 1084.0 |
| V118 | 1152.4 | 1143.8 | 1132.9 | 1151.8 | 1147.5 | 1146.5 | 1092.0 | 1091.7 | 1089.7 |
| V119 | 1157.3 | 1151.1 | 1149.8 | 1156.5 | 1155.3 | 1150.3 | 1114.1 | 1117.4 | 1106.2 |
| V120 | 1173.9 | 1156.3 | 1158.6 | 1174.1 | 1159.6 | 1161.4 | 1119.7 | 1123.0 | 1114.8 |
| V121 | 1183.5 | 1163.1 | 1167.8 | 1184.4 | 1166.4 | 1169.2 | 1132.0 | 1126.0 | 1121.3 |
| V122 | 1192.4 | 1176.1 | 1180.7 | 1192.0 | 1178.2 | 1178.3 | 1136.7 | 1132.0 | 1133.0 |
| V123 | 1193.3 | 1195.7 | 1189.7 | 1192.7 | 1196.0 | 1189.0 | 1152.7 | 1144.5 | 1139.4 |
| V124 | 1196.3 | 1197.4 | 1193.4 | 1195.2 | 1196.8 | 1192.1 | 1160.2 | 1157.1 | 1152.9 |
| V125 | 1200.7 | 1202.1 | 1197.2 | 1199.7 | 1203.3 | 1196.5 | 1179.0 | 1159.9 | 1157.8 |
| V126 | 1203.8 | 1206.8 | 1198.6 | 1203.1 | 1206.7 | 1198.0 | 1192.7 | 1167.3 | 1175.1 |
| V127 | 1204.8 | 1207.1 | 1204.7 | 1204.7 | 1208.8 | 1208.2 | 1193.4 | 1185.9 | 1192.2 |
| V128 | 1216.2 | 1209.9 | 1212.1 | 1214.9 | 1210.6 | 1213.3 | 1196.6 | 1195.4 | 1197.9 |
| V129 | 1229.7 | 1222.5 | 1224.3 | 1228.2 | 1225.2 | 1226.2 | 1197.4 | 1197.5 | 1198.3 |
| V130 | 1247.2 | 1230.2 | 1245.7 | 1247.2 | 1231.6 | 1241.4 | 1201.5 | 1200.6 | 1200.0 |
| V131 | 1271.5 | 1236.4 | 1249.7 | 1270.3 | 1235.2 | 1264.0 | 1209.3 | 1209.4 | 1211.0 |
| V132 | 1285.7 | 1261.8 | 1265.8 | 1285.4 | 1263.1 | 1264.5 | 1210.5 | 1210.8 | 1212.1 |
| V133 | 1294.7 | 1264.1 | 1276.1 | 1293.9 | 1266.1 | 1277.8 | 1214.6 | 1215.2 | 1214.4 |
| V134 | 1304.9 | 1275.4 | 1285.5 | 1304.0 | 1274.0 | 1280.8 | 1222.2 | 1217.8 | 1221.3 |
| V135 | 1309.5 | 1302.4 | 1292.7 | 1308.5 | 1303.1 | 1293.2 | 1259.1 | 1227.0 | 1247.3 |
| V136 | 1315.6 | 1306.5 | 1296.8 | 1315.1 | 1309.8 | 1298.0 | 1274.7 | 1248.8 | 1257.7 |
| V137 | 1329.9 | 1316.9 | 1306.8 | 1327.5 | 1317.6 | 1312.1 | 1278.1 | 1261.5 | 1274.9 |
| V138 | 1331.9 | 1325.4 | 1322.2 | 1331.4 | 1325.8 | 1331.0 | 1299.8 | 1268.8 | 1281.6 |
| V139 | 1337.8 | 1340.4 | 1330.8 | 1337.4 | 1340.2 | 1332.6 | 1305.5 | 1278.7 | 1291.3 |
| V140 | 1342.2 | 1343.7 | 1331.2 | 1342.0 | 1343.5 | 1333.0 | 1313.0 | 1289.3 | 1304.5 |
| V141 | 1344.1 | 1352.1 | 1348.1 | 1344.1 | 1351.7 | 1347.4 | 1317.3 | 1308.3 | 1306.3 |
| V142 | 1357.8 | 1352.9 | 1353.1 | 1357.0 | 1354.6 | 1352.6 | 1324.3 | 1319.9 | 1309.8 |
| V143 | 1359.7 | 1361.4 | 1355.7 | 1359.4 | 1363.3 | 1355.6 | 1341.6 | 1325.3 | 1336.3 |
| V144 | 1360.7 | 1365.5 | 1363.0 | 1360.2 | 1363.6 | 1356.1 | 1341.7 | 1339.5 | 1341.8 |
| V145 | 1368.6 | 1372.5 | 1368.9 | 1368.2 | 1374.2 | 1367.7 | 1345.7 | 1347.1 | 1343.3 |
| V146 | 1380.5 | 1379.0 | 1381.1 | 1379.8 | 1379.9 | 1378.3 | 1352.2 | 1352.4 | 1344.0 |
| V147 | 1382.9 | 1384.0 | 1382.7 | 1381.8 | 1381.8 | 1383.4 | 1362.2 | 1357.7 | 1359.2 |
| V148 | 1412.0 | 1420.7 | 1403.2 | 1411.6 | 1423.2 | 1399.9 | 1363.4 | 1368.2 | 1363.1 |
| V149 | 1446.8 | 1434.9 | 1427.2 | 1445.6 | 1435.4 | 1425.5 | 1366.8 | 1370.7 | 1367.2 |
| V150 | 1464.5 | 1448.7 | 1452.7 | 1463.7 | 1442.1 | 1453.2 | 1366.9 | 1376.4 | 1370.8 |
| V151 | 1467.0 | 1460.1 | 1455.1 | 1465.9 | 1460.3 | 1458.3 | 1383.1 | 1378.0 | 1380.9 |
| V152 | 1469.8 | 1463.0 | 1462.7 | 1469.5 | 1465.2 | 1468.2 | 1387.0 | 1386.6 | 1389.1 |
| V153 | 1484.2 | 1485.0 | 1475.4 | 1483.0 | 1484.4 | 1477.3 | 1391.5 | 1389.6 | 1402.4 |
| V154 | 1497.2 | 1487.3 | 1485.7 | 1496.5 | 1486.6 | 1481.5 | 1419.3 | 1422.5 | 1414.0 |
| V155 | 1498.1 | 1491.6 | 1488.9 | 1497.9 | 1492.0 | 1488.1 | 1456.6 | 1441.6 | 1430.1 |
| V156 | 1498.7 | 1497.5 | 1491.8 | 1498.0 | 1495.8 | 1491.7 | 1471.2 | 1457.3 | 1451.6 |
| V157 | 1517.1 | 1499.8 | 1492.5 | 1515.9 | 1499.6 | 1497.5 | 1473.0 | 1463.4 | 1461.5 |

|      |        |        |        |        |        |        |        |        |        |
|------|--------|--------|--------|--------|--------|--------|--------|--------|--------|
| V158 | 1520.2 | 1504.9 | 1503.9 | 1519.7 | 1505.7 | 1500.1 | 1485.8 | 1480.9 | 1468.8 |
| V159 | 1531.7 | 1515.7 | 1506.0 | 1531.9 | 1515.1 | 1505.2 | 1494.8 | 1489.7 | 1485.0 |
| V160 | 1545.9 | 1542.6 | 1516.7 | 1544.9 | 1542.2 | 1509.3 | 1500.3 | 1491.4 | 1493.5 |
| V161 | 1562.0 | 1546.8 | 1525.0 | 1561.2 | 1546.2 | 1529.7 | 1500.7 | 1496.0 | 1498.2 |
| V162 | 1570.5 | 1555.2 | 1539.4 | 1570.3 | 1554.1 | 1532.7 | 1503.1 | 1502.3 | 1500.7 |
| V163 | 1574.5 | 1564.1 | 1548.0 | 1573.5 | 1557.6 | 1537.9 | 1519.3 | 1503.1 | 1503.5 |
| V164 | 1601.7 | 1576.0 | 1552.4 | 1600.3 | 1569.6 | 1550.4 | 1524.4 | 1508.0 | 1512.6 |
| V165 | 1617.9 | 1577.2 | 1565.6 | 1616.8 | 1571.9 | 1565.6 | 1535.2 | 1519.3 | 1515.3 |
| V166 | 1625.2 | 1590.1 | 1584.4 | 1623.5 | 1583.5 | 1573.5 | 1550.1 | 1547.6 | 1522.6 |
| V167 | 1627.4 | 1595.4 | 1603.7 | 1625.5 | 1592.1 | 1585.5 | 1567.6 | 1555.8 | 1539.6 |
| V168 | 1632.2 | 1605.1 | 1612.5 | 1630.3 | 1602.5 | 1604.9 | 1576.3 | 1563.5 | 1548.6 |
| V169 | 1644.4 | 1608.6 | 1617.0 | 1642.3 | 1609.0 | 1609.6 | 1582.9 | 1571.1 | 1555.5 |
| V170 | 1645.4 | 1635.3 | 1620.0 | 1643.1 | 1632.4 | 1616.9 | 1607.6 | 1578.5 | 1566.2 |
| V171 | 1650.5 | 1642.8 | 1640.0 | 1647.9 | 1642.8 | 1636.7 | 1625.9 | 1584.4 | 1569.3 |
| V172 | 1657.4 | 1646.6 | 1642.9 | 1654.8 | 1643.9 | 1640.1 | 1627.3 | 1592.8 | 1580.4 |
| V173 | 1666.5 | 1649.4 | 1647.3 | 1664.7 | 1645.2 | 1644.7 | 1632.1 | 1600.2 | 1600.6 |
| V174 | 1667.2 | 1653.4 | 1652.5 | 1665.2 | 1651.1 | 1649.5 | 1635.5 | 1610.5 | 1612.9 |
| V175 | 1672.1 | 1658.0 | 1660.4 | 1669.9 | 1654.4 | 1653.3 | 1646.4 | 1617.8 | 1618.4 |
| V176 | 1743.3 | 1666.9 | 1662.5 | 1735.3 | 1660.2 | 1657.2 | 1649.2 | 1642.3 | 1624.6 |
| V177 | 1754.5 | 1691.1 | 1716.7 | 1746.0 | 1681.3 | 1690.0 | 1654.3 | 1645.2 | 1646.4 |
| V178 | 3190.0 | 3175.1 | 3180.3 | 3186.4 | 3174.1 | 3181.2 | 1659.9 | 1649.0 | 1647.1 |
| V179 | 3192.3 | 3182.2 | 3187.4 | 3188.9 | 3188.0 | 3192.2 | 1668.5 | 1651.9 | 1654.8 |
| V180 | 3197.2 | 3192.5 | 3190.0 | 3194.4 | 3190.4 | 3194.9 | 1675.6 | 1657.2 | 1658.1 |
| V181 | 3197.8 | 3207.0 | 3191.2 | 3197.3 | 3204.0 | 3195.4 | 1682.4 | 1664.0 | 1663.2 |
| V182 | 3200.6 | 3211.4 | 3196.0 | 3197.8 | 3208.4 | 3196.2 | 1743.9 | 1670.1 | 1666.2 |
| V183 | 3204.3 | 3211.6 | 3199.8 | 3200.0 | 3210.2 | 3202.9 | 1758.0 | 1699.5 | 1711.6 |
| V184 | 3206.0 | 3213.4 | 3201.6 | 3201.9 | 3211.4 | 3205.3 | 3187.5 | 3177.3 | 3192.7 |
| V185 | 3206.2 | 3213.7 | 3204.9 | 3202.9 | 3212.1 | 3209.2 | 3192.8 | 3177.9 | 3195.8 |
| V186 | 3208.1 | 3218.0 | 3207.2 | 3204.0 | 3213.7 | 3209.5 | 3194.1 | 3205.4 | 3198.2 |
| V187 | 3209.0 | 3219.5 | 3207.7 | 3207.3 | 3216.2 | 3209.9 | 3201.2 | 3212.2 | 3198.9 |
| V188 | 3212.5 | 3220.5 | 3214.5 | 3210.6 | 3217.4 | 3215.4 | 3201.4 | 3213.9 | 3202.5 |
| V189 | 3214.9 | 3222.6 | 3214.7 | 3211.2 | 3217.5 | 3216.3 | 3203.6 | 3214.8 | 3207.4 |
| V190 | 3218.6 | 3223.7 | 3216.7 | 3214.5 | 3220.7 | 3217.9 | 3203.7 | 3219.0 | 3210.3 |
| V191 | 3222.1 | 3225.4 | 3217.7 | 3217.6 | 3221.1 | 3218.1 | 3215.6 | 3220.3 | 3219.9 |
| V192 | 3225.3 | 3226.2 | 3218.8 | 3218.7 | 3221.6 | 3218.4 | 3216.7 | 3222.3 | 3223.3 |
| V193 | 3226.8 | 3228.1 | 3219.4 | 3222.6 | 3222.5 | 3221.0 | 3217.9 | 3225.5 | 3224.5 |
| V194 | 3229.2 | 3228.1 | 3220.1 | 3227.3 | 3224.9 | 3221.5 | 3227.1 | 3225.6 | 3225.0 |
| V195 | 3230.1 | 3232.7 | 3220.2 | 3227.9 | 3228.5 | 3222.3 | 3232.9 | 3228.2 | 3227.1 |
| V196 | 3230.6 | 3233.3 | 3231.0 | 3228.7 | 3230.5 | 3233.2 | 3234.9 | 3237.1 | 3230.4 |
| V197 | 3232.4 | 3240.5 | 3234.3 | 3230.4 | 3235.2 | 3235.1 | 3235.4 | 3237.9 | 3234.8 |
| V198 | 3236.5 | 3242.7 | 3234.6 | 3231.5 | 3244.2 | 3236.0 | 3238.3 | 3238.0 | 3237.9 |
| V199 | 3237.8 | 3249.2 | 3244.6 | 3233.0 | 3248.7 | 3244.1 | 3239.5 | 3240.3 | 3237.9 |
| V200 | 3249.7 | 3261.1 | 3260.9 | 3243.9 | 3269.6 | 3263.8 | 3243.8 | 3246.4 | 3244.2 |
| V201 | 3262.0 | 3279.3 | 3267.6 | 3258.3 | 3277.4 | 3272.3 | 3244.5 | 3246.8 | 3246.2 |

**Table S2.** Absorption and emission wavelength/nm of the title compound according to TDDFT calculations

|                | Absorption data |            |            | Emission data |            |            |
|----------------|-----------------|------------|------------|---------------|------------|------------|
|                | monomer         | In toluene | In cluster | monomer       | In toluene | In cluster |
| B3LYP          | 553.9           | 560.0      | 570.9      | 683.9         | 697.6      | 703.2      |
| PBE0           | 867.4           | 887.4      | 900.4      | 1144.4        | 1159.7     | 1181.1     |
| CAM-B3LYP      | 348.7           | 370.6      | 398.8      | 399.7         | 403.2      | 408.8      |
| M08            | 380.0           | 383.5      | 413.7      | 414.9         | 416.4      | 424.7      |
| M06            | 490.7           | 494.9      | 505.9      | 601.2         | 604.4      | 609.2      |
| $\omega$ B97XD | 375.0           | 372.6      | 374.4      | 394.9         | 398.4      | 399.9      |
| CAM-B3LYP*     | 411.4           | 414.6      | 561.8      | 567.9         | 575.1      | 610.4      |

(B3LYP/6-31g(d):uff method is employed in cluster)

**Table S3.** Vertical excitation energies ( $E_{\perp}$ , eV), wavelength (nm) and singly occupied orbitals involved in the  $S_0 \rightarrow S_n$  or  $T_n$  electronic transitions in vacuum, solution, and cluster, which are computed by TD-B3LYP.

|       | In vacuum        |                |                              | In toluene       |                |                                | In cluster       |                |                              |
|-------|------------------|----------------|------------------------------|------------------|----------------|--------------------------------|------------------|----------------|------------------------------|
|       | $E_{\perp}$ (eV) | $\lambda$ (nm) | Assignments                  | $E_{\perp}$ (eV) | $\lambda$ (nm) | Assignments                    | $E_{\perp}$ (eV) | $\lambda$ (nm) | Assignments                  |
| $S_1$ | 2.24             | 554            | HOMO $\rightarrow$<br>LUMO   | 1.88             | 658            | HOMO $\rightarrow$<br>LUMO     | 1.95             | 633            | HOMO $\rightarrow$<br>LUMO   |
| $S_2$ | 2.91             | 426            | HOMO-1 $\rightarrow$<br>LUMO | 2.78             | 446            | HOMO-1 $\rightarrow$<br>LUMO   | 2.73             | 454            | HOMO-1 $\rightarrow$<br>LUMO |
| $S_3$ | 2.94             | 421            | HOMO-4 $\rightarrow$<br>LUMO | 2.79             | 444            | HOMO-4 $\rightarrow$<br>LUMO   | 2.74             | 451            | HOMO-9 $\rightarrow$<br>LUMO |
| $S_4$ | 3.21             | 386            | HOMO-8 $\rightarrow$<br>LUMO | 2.84             | 437            | HOMO $\rightarrow$<br>LUMO+1   | 2.78             | 446            | HOMO-4 $\rightarrow$<br>LUMO |
| $S_5$ | 3.26             | 380            | HOMO $\rightarrow$<br>LUMO+1 | 2.89             | 429            | HOMO-7 $\rightarrow$<br>LUMO   | 2.93             | 422            | HOMO $\rightarrow$<br>LUMO+1 |
| $T_1$ | 2.10             | 589            | HOMO $\rightarrow$<br>LUMO   | 1.51             | 821            | HOMO $\rightarrow$<br>LUMO     | 1.57             | 787            | HOMO $\rightarrow$<br>LUMO   |
| $T_2$ | 2.51             | 494            | HOMO-4 $\rightarrow$<br>LUMO | 2.24             | 553            | HOMO $\rightarrow$<br>LUMO+1   | 2.32             | 535            | HOMO $\rightarrow$<br>LUMO+1 |
| $T_3$ | 2.65             | 468            | HOMO $\rightarrow$<br>LUMO+2 | 2.37             | 522            | HOMO-4 $\rightarrow$<br>LUMO+1 | 2.35             | 527            | HOMO-4 $\rightarrow$<br>LUMO |
| $T_4$ | 2.73             | 454            | HOMO-2 $\rightarrow$<br>LUMO | 2.41             | 514            | HOMO-2 $\rightarrow$<br>LUMO   | 2.39             | 518            | HOMO-2 $\rightarrow$<br>LUMO |
| $T_5$ | 2.75             | 450            | HOMO-8 $\rightarrow$<br>LUMO | 2.62             | 474            | HOMO-9 $\rightarrow$<br>LUMO   | 2.61             | 475            | HOMO-8 $\rightarrow$<br>LUMO |

**Table S4.** Spin-orbital coupling (SOC)/ $\text{cm}^{-1}$ , intersystem crossing rate ( $k_{\text{isc}}$ ), and reverse intersystem crossing rate ( $k_{\text{risc}}$ ) of the title compound at the  $S_1$  and  $T_1$  minima.

|                                                      | In vacuum             |                        | In toluene            |                       | In cluster            |                       |
|------------------------------------------------------|-----------------------|------------------------|-----------------------|-----------------------|-----------------------|-----------------------|
|                                                      | $S_1 \rightarrow T_1$ | $T_1 \rightarrow S_1$  | $S_1 \rightarrow T_1$ | $T_1 \rightarrow S_1$ | $S_1 \rightarrow T_1$ | $T_1 \rightarrow S_1$ |
| SOC                                                  | 1.65                  | 0.047                  | 1.53                  | 0.31                  | 1.07                  | 0.938                 |
| $k_{\text{isc}}$ or $k_{\text{risc}}/ \text{S}^{-1}$ | $1.545 \times 10^6$   | $5.69 \times 10^{-15}$ | $9.49 \times 10^7$    | $2.16 \times 10^{-9}$ | $5.085 \times 10^8$   | $4.399 \times 10^4$   |

the  $\lambda_{\text{reorg}}$  is from NMA method with Cartesian coordinate, the temperature is 300K.





**Table S5.** The reorganization energy ( $\text{cm}^{-1}$ ) between  $S_1$  and  $T_1$  minima vs each frequency of the title compound by NMA method with internal coordinate

| frequency. | In vacuum             |                       | In toluene            |                       | In cluster            |                       |
|------------|-----------------------|-----------------------|-----------------------|-----------------------|-----------------------|-----------------------|
|            | $S_1 \rightarrow T_1$ | $T_1 \rightarrow S_1$ | $S_1 \rightarrow T_1$ | $T_1 \rightarrow S_1$ | $S_1 \rightarrow T_1$ | $T_1 \rightarrow S_1$ |
| $\nu_1$    | 1.49                  | 7.93                  | 4.97                  | 14.19                 | 15.37                 | 20.34                 |
| $\nu_2$    | 23.89                 | 12.77                 | 12.44                 | 1.10                  | 0.05                  | 0.87                  |
| $\nu_3$    | 63.61                 | 76.04                 | 23.06                 | 4.61                  | 0.00                  | 40.47                 |
| $\nu_4$    | 5.70                  | 32.41                 | 0.61                  | 128.94                | 1.42                  | 48.39                 |
| $\nu_5$    | 40.93                 | 49.70                 | 7.02                  | 112.70                | 5.40                  | 22.32                 |
| $\nu_6$    | 402.86                | 5.23                  | 309.23                | 14.35                 | 0.07                  | 6.27                  |
| $\nu_7$    | 178.54                | 15.15                 | 72.13                 | 1.07                  | 1.30                  | 29.77                 |
| $\nu_8$    | 318.22                | 13.92                 | 128.14                | 11.14                 | 2.65                  | 8.14                  |
| $\nu_9$    | 16.92                 | 11.25                 | 0.01                  | 2.69                  | 7.01                  | 0.49                  |
| $\nu_{10}$ | 89.46                 | 7.65                  | 32.21                 | 0.17                  | 37.70                 | 0.25                  |
| $\nu_{11}$ | 32.96                 | 1.07                  | 11.84                 | 0.26                  | 12.02                 | 14.92                 |
| $\nu_{12}$ | 21.71                 | 44.04                 | 10.66                 | 19.98                 | 39.39                 | 1.15                  |
| $\nu_{13}$ | 45.00                 | 1.03                  | 15.24                 | 2.34                  | 91.00                 | 0.01                  |
| $\nu_{14}$ | 48.16                 | 34.34                 | 23.47                 | 0.05                  | 0.01                  | 2.39                  |
| $\nu_{15}$ | 18.87                 | 3.19                  | 10.33                 | 9.57                  | 88.40                 | 0.16                  |
| $\nu_{16}$ | 20.35                 | 2.52                  | 28.09                 | 3.93                  | 1.51                  | 47.98                 |
| $\nu_{17}$ | 23.08                 | 2.57                  | 13.47                 | 6.43                  | 7.02                  | 87.76                 |
| $\nu_{18}$ | 6.95                  | 9.52                  | 3.82                  | 3.23                  | 6.91                  | 1.84                  |
| $\nu_{19}$ | 1.62                  | 0.75                  | 0.39                  | 0.22                  | 32.67                 | 0.71                  |
| $\nu_{20}$ | 9.30                  | 40.13                 | 10.74                 | 17.10                 | 7.90                  | 22.23                 |
| $\nu_{21}$ | 1.11                  | 2.14                  | 2.45                  | 4.50                  | 82.69                 | 13.23                 |
| $\nu_{22}$ | 10.29                 | 6.55                  | 4.88                  | 0.48                  | 1.82                  | 45.16                 |
| $\nu_{23}$ | 9.61                  | 2.28                  | 5.72                  | 0.01                  | 3.76                  | 0.47                  |
| $\nu_{24}$ | 9.09                  | 2.54                  | 0.70                  | 2.35                  | 0.30                  | 5.80                  |
| $\nu_{25}$ | 0.01                  | 3.95                  | 0.18                  | 1.70                  | 0.02                  | 4.76                  |
| $\nu_{26}$ | 0.01                  | 3.48                  | 0.00                  | 0.92                  | 1.92                  | 1.88                  |
| $\nu_{27}$ | 0.04                  | 0.27                  | 0.14                  | 0.00                  | 0.00                  | 98.34                 |
| $\nu_{28}$ | 9.01                  | 2.52                  | 0.18                  | 0.09                  | 0.47                  | 28.45                 |
| $\nu_{29}$ | 2.38                  | 0.37                  | 0.76                  | 0.84                  | 0.01                  | 7.78                  |
| $\nu_{30}$ | 1.19                  | 4.67                  | 0.10                  | 1.43                  | 4.16                  | 8.48                  |
| $\nu_{31}$ | 8.15                  | 0.00                  | 2.01                  | 0.00                  | 3.01                  | 0.80                  |
| $\nu_{32}$ | 1.18                  | 17.42                 | 2.35                  | 3.60                  | 19.06                 | 5.07                  |
| $\nu_{33}$ | 6.98                  | 2.32                  | 0.03                  | 14.60                 | 64.61                 | 0.00                  |
| $\nu_{34}$ | 14.35                 | 0.92                  | 19.65                 | 9.79                  | 8.78                  | 2.10                  |
| $\nu_{35}$ | 71.35                 | 41.70                 | 31.37                 | 27.52                 | 12.98                 | 0.01                  |
| $\nu_{36}$ | 14.70                 | 0.08                  | 14.36                 | 0.74                  | 0.05                  | 2.08                  |
| $\nu_{37}$ | 1.85                  | 0.03                  | 0.97                  | 0.21                  | 0.67                  | 0.00                  |
| $\nu_{38}$ | 2.04                  | 0.81                  | 0.79                  | 0.19                  | 0.07                  | 49.37                 |
| $\nu_{39}$ | 0.96                  | 0.14                  | 0.37                  | 0.08                  | 3.33                  | 47.27                 |
| $\nu_{40}$ | 0.03                  | 0.03                  | 0.00                  | 0.01                  | 2.86                  | 11.31                 |
| $\nu_{41}$ | 0.08                  | 0.25                  | 0.06                  | 0.25                  | 13.50                 | 1.18                  |
| $\nu_{42}$ | 5.25                  | 6.15                  | 0.86                  | 0.22                  | 8.38                  | 0.00                  |
| $\nu_{43}$ | 0.24                  | 11.24                 | 6.30                  | 5.98                  | 2.60                  | 3.74                  |
| $\nu_{44}$ | 7.71                  | 0.41                  | 0.19                  | 0.62                  | 17.75                 | 0.16                  |
| $\nu_{45}$ | 0.00                  | 1.07                  | 0.00                  | 0.15                  | 0.02                  | 3.01                  |
| $\nu_{46}$ | 1.30                  | 1.26                  | 0.16                  | 0.06                  | 0.62                  | 4.96                  |
| $\nu_{47}$ | 0.27                  | 0.18                  | 0.00                  | 0.29                  | 0.06                  | 4.80                  |
| $\nu_{48}$ | 1.45                  | 0.02                  | 0.51                  | 0.39                  | 0.13                  | 10.29                 |

|      |       |        |      |       |       |       |
|------|-------|--------|------|-------|-------|-------|
| V49  | 0.04  | 4.73   | 0.04 | 0.31  | 0.22  | 22.08 |
| V50  | 2.19  | 0.10   | 1.34 | 0.01  | 1.07  | 0.00  |
| V51  | 0.32  | 10.01  | 0.10 | 1.18  | 0.07  | 14.32 |
| V52  | 2.98  | 0.14   | 0.43 | 0.02  | 2.25  | 2.53  |
| V53  | 0.16  | 4.48   | 0.04 | 0.19  | 0.17  | 2.70  |
| V54  | 0.02  | 1.44   | 0.00 | 0.02  | 0.01  | 0.01  |
| V55  | 5.77  | 0.00   | 1.67 | 2.32  | 6.30  | 0.43  |
| V56  | 0.01  | 1.03   | 0.14 | 0.74  | 2.33  | 1.19  |
| V57  | 3.14  | 4.53   | 1.66 | 0.19  | 0.01  | 0.26  |
| V58  | 0.15  | 1.22   | 0.00 | 0.95  | 1.20  | 0.11  |
| V59  | 1.04  | 1.01   | 0.50 | 0.32  | 0.33  | 8.49  |
| V60  | 2.40  | 2.47   | 0.70 | 0.92  | 0.18  | 5.14  |
| V61  | 0.20  | 1.20   | 0.10 | 0.22  | 0.00  | 0.07  |
| V62  | 4.26  | 0.04   | 3.49 | 0.00  | 1.21  | 0.17  |
| V63  | 0.45  | 1.36   | 0.26 | 3.96  | 1.42  | 0.08  |
| V64  | 0.48  | 1.76   | 0.08 | 0.98  | 8.25  | 1.06  |
| V65  | 0.53  | 1.28   | 0.54 | 0.00  | 0.90  | 0.61  |
| V66  | 2.03  | 2.55   | 0.72 | 0.61  | 2.46  | 2.13  |
| V67  | 0.05  | 1.39   | 0.44 | 0.21  | 4.08  | 0.53  |
| V68  | 3.30  | 3.12   | 2.42 | 2.09  | 1.07  | 11.99 |
| V69  | 0.17  | 0.33   | 0.48 | 1.20  | 0.02  | 0.44  |
| V70  | 1.35  | 0.06   | 0.39 | 0.01  | 0.17  | 1.03  |
| V71  | 14.43 | 5.59   | 6.04 | 4.19  | 3.31  | 2.92  |
| V72  | 0.56  | 4.82   | 0.43 | 0.00  | 0.07  | 0.02  |
| V73  | 0.02  | 0.23   | 0.00 | 0.03  | 0.24  | 2.35  |
| V74  | 0.02  | 1.76   | 0.01 | 0.02  | 0.00  | 6.11  |
| V75  | 0.00  | 208.47 | 0.25 | 0.01  | 0.01  | 0.28  |
| V76  | 0.00  | 0.03   | 0.46 | 3.55  | 0.21  | 0.12  |
| V77  | 0.72  | 4.40   | 0.01 | 2.98  | 1.15  | 1.68  |
| V78  | 7.11  | 32.73  | 0.85 | 79.70 | 0.34  | 8.47  |
| V79  | 5.57  | 7.64   | 1.73 | 3.46  | 2.26  | 0.04  |
| V80  | 1.91  | 17.05  | 0.54 | 16.70 | 0.22  | 0.02  |
| V81  | 0.04  | 1.26   | 0.80 | 0.14  | 1.32  | 1.81  |
| V82  | 35.75 | 0.96   | 5.04 | 0.59  | 0.04  | 1.08  |
| V83  | 2.44  | 3.09   | 0.04 | 0.58  | 0.41  | 0.15  |
| V84  | 0.69  | 0.05   | 0.03 | 0.01  | 0.03  | 0.20  |
| V85  | 0.00  | 0.02   | 0.00 | 0.00  | 0.01  | 11.02 |
| V86  | 0.00  | 1.91   | 0.00 | 0.01  | 0.02  | 0.71  |
| V87  | 0.00  | 0.02   | 0.00 | 0.09  | 0.67  | 17.97 |
| V88  | 0.02  | 0.67   | 0.15 | 0.31  | 12.18 | 2.06  |
| V89  | 0.91  | 31.63  | 0.14 | 0.04  | 0.02  | 0.03  |
| V90  | 0.75  | 0.30   | 1.26 | 10.78 | 0.08  | 0.05  |
| V91  | 15.89 | 0.01   | 2.19 | 11.99 | 1.22  | 0.03  |
| V92  | 0.00  | 4.81   | 0.00 | 0.01  | 0.00  | 0.01  |
| V93  | 4.60  | 4.53   | 2.15 | 2.44  | 0.31  | 0.16  |
| V94  | 0.01  | 3.90   | 0.00 | 1.04  | 0.18  | 16.47 |
| V95  | 0.10  | 0.00   | 0.01 | 0.00  | 0.00  | 0.00  |
| V96  | 2.01  | 3.23   | 0.41 | 2.60  | 0.10  | 0.45  |
| V97  | 0.00  | 0.02   | 0.42 | 0.00  | 0.02  | 0.87  |
| V98  | 0.83  | 22.18  | 2.29 | 0.00  | 2.03  | 1.74  |
| V99  | 15.30 | 0.00   | 2.24 | 0.05  | 0.01  | 0.33  |
| V100 | 0.05  | 0.46   | 0.00 | 9.00  | 0.01  | 2.94  |
| V101 | 0.14  | 0.25   | 0.53 | 0.00  | 0.01  | 0.01  |
| V102 | 3.26  | 2.08   | 0.00 | 0.59  | 0.01  | 0.06  |

|      |        |        |       |        |        |        |
|------|--------|--------|-------|--------|--------|--------|
| V103 | 0.00   | 0.25   | 0.00  | 0.01   | 0.07   | 1.11   |
| V104 | 0.04   | 5.40   | 0.00  | 0.02   | 0.06   | 0.07   |
| V105 | 0.05   | 0.00   | 0.04  | 0.32   | 0.57   | 0.00   |
| V106 | 1.10   | 0.01   | 0.81  | 0.01   | 7.41   | 0.01   |
| V107 | 11.14  | 0.47   | 8.53  | 0.25   | 10.83  | 1.96   |
| V108 | 9.90   | 1.06   | 3.07  | 1.17   | 0.69   | 8.80   |
| V109 | 1.02   | 17.72  | 0.04  | 9.09   | 1.79   | 0.00   |
| V110 | 0.04   | 7.44   | 0.42  | 4.17   | 0.15   | 0.00   |
| V111 | 2.05   | 10.87  | 2.12  | 6.04   | 0.10   | 0.48   |
| V112 | 0.39   | 1.40   | 0.26  | 1.58   | 4.98   | 0.74   |
| V113 | 5.94   | 12.57  | 5.03  | 11.68  | 0.17   | 2.91   |
| V114 | 0.07   | 0.00   | 0.05  | 0.01   | 6.20   | 14.95  |
| V115 | 7.83   | 79.35  | 2.24  | 63.69  | 0.99   | 3.15   |
| V116 | 6.87   | 1.05   | 12.05 | 15.59  | 91.39  | 2.43   |
| V117 | 95.18  | 28.37  | 45.67 | 3.82   | 2.14   | 3.67   |
| V118 | 0.45   | 39.71  | 0.73  | 2.09   | 1.42   | 8.63   |
| V119 | 8.50   | 6.18   | 4.46  | 2.35   | 10.21  | 24.06  |
| V120 | 2.31   | 0.03   | 9.82  | 0.79   | 23.16  | 0.80   |
| V121 | 4.41   | 10.98  | 2.71  | 5.95   | 3.65   | 0.70   |
| V122 | 24.21  | 17.55  | 6.59  | 9.54   | 5.70   | 6.25   |
| V123 | 1.39   | 0.00   | 0.39  | 0.01   | 4.40   | 42.42  |
| V124 | 0.08   | 0.00   | 0.02  | 0.02   | 0.23   | 4.08   |
| V125 | 0.03   | 1.08   | 0.17  | 1.67   | 0.56   | 5.76   |
| V126 | 0.03   | 0.27   | 0.01  | 0.00   | 4.29   | 12.94  |
| V127 | 1.64   | 9.56   | 2.95  | 4.34   | 0.28   | 9.38   |
| V128 | 4.35   | 0.28   | 1.65  | 0.30   | 1.49   | 2.86   |
| V129 | 6.54   | 24.51  | 0.01  | 41.68  | 21.81  | 18.60  |
| V130 | 132.13 | 154.04 | 35.18 | 124.20 | 13.59  | 0.53   |
| V131 | 43.81  | 187.61 | 72.54 | 7.71   | 39.05  | 0.03   |
| V132 | 0.58   | 0.65   | 0.01  | 2.93   | 0.24   | 5.28   |
| V133 | 0.31   | 114.60 | 1.55  | 0.36   | 20.64  | 1.39   |
| V134 | 96.36  | 19.90  | 72.83 | 53.04  | 89.53  | 1.59   |
| V135 | 0.44   | 1.92   | 0.02  | 1.36   | 0.01   | 6.59   |
| V136 | 122.86 | 0.92   | 77.17 | 0.42   | 227.00 | 54.05  |
| V137 | 0.08   | 13.74  | 0.04  | 0.41   | 27.87  | 1.31   |
| V138 | 32.03  | 18.69  | 26.78 | 9.96   | 0.00   | 11.88  |
| V139 | 0.31   | 27.26  | 0.05  | 0.00   | 0.05   | 26.34  |
| V140 | 1.60   | 0.08   | 0.56  | 31.78  | 0.01   | 137.17 |
| V141 | 3.20   | 5.08   | 5.54  | 93.83  | 5.77   | 2.83   |
| V142 | 6.81   | 3.44   | 0.14  | 0.23   | 0.06   | 0.54   |
| V143 | 0.00   | 0.00   | 1.39  | 0.72   | 21.09  | 16.94  |
| V144 | 19.60  | 100.40 | 9.50  | 16.69  | 87.23  | 5.77   |
| V145 | 105.41 | 10.33  | 62.09 | 3.38   | 0.30   | 0.31   |
| V146 | 56.90  | 0.46   | 36.21 | 49.05  | 33.22  | 5.42   |
| V147 | 13.47  | 155.52 | 0.68  | 14.16  | 29.62  | 13.89  |
| V148 | 24.59  | 215.93 | 12.22 | 27.65  | 20.35  | 129.10 |
| V149 | 1.75   | 81.98  | 0.04  | 14.13  | 9.75   | 0.09   |
| V150 | 76.51  | 2.55   | 50.88 | 2.46   | 21.14  | 3.01   |
| V151 | 13.20  | 0.07   | 2.78  | 0.99   | 8.87   | 0.14   |
| V152 | 2.11   | 2.83   | 0.07  | 4.62   | 0.00   | 178.48 |
| V153 | 5.09   | 1.45   | 0.11  | 5.40   | 2.93   | 108.73 |
| V154 | 3.36   | 0.04   | 2.62  | 4.22   | 2.02   | 2.40   |
| V155 | 0.04   | 1.88   | 0.04  | 0.03   | 5.88   | 14.74  |
| V156 | 2.81   | 0.02   | 0.70  | 0.00   | 0.23   | 5.47   |

|      |        |        |        |        |        |        |
|------|--------|--------|--------|--------|--------|--------|
| V157 | 0.29   | 13.04  | 0.07   | 1.39   | 0.08   | 5.64   |
| V158 | 0.25   | 28.62  | 0.07   | 9.42   | 0.51   | 1.78   |
| V159 | 34.64  | 1.52   | 8.40   | 9.82   | 26.83  | 4.88   |
| V160 | 1.70   | 30.22  | 1.69   | 0.21   | 3.76   | 0.05   |
| V161 | 0.12   | 25.66  | 0.84   | 16.68  | 26.86  | 3.79   |
| V162 | 12.54  | 4.11   | 6.06   | 0.68   | 0.01   | 0.03   |
| V163 | 1.55   | 1.86   | 7.63   | 3.11   | 2.46   | 4.55   |
| V164 | 83.35  | 10.92  | 84.02  | 8.46   | 78.88  | 15.17  |
| V165 | 0.00   | 17.36  | 8.33   | 7.51   | 19.21  | 6.60   |
| V166 | 129.32 | 47.06  | 38.17  | 0.98   | 124.82 | 10.43  |
| V167 | 1.22   | 100.29 | 5.52   | 138.63 | 0.10   | 39.89  |
| V168 | 6.57   | 148.02 | 0.01   | 2.57   | 18.21  | 3.05   |
| V169 | 13.81  | 83.12  | 13.75  | 0.73   | 13.89  | 23.06  |
| V170 | 155.38 | 111.98 | 130.28 | 0.00   | 80.51  | 27.39  |
| V171 | 8.30   | 0.00   | 0.22   | 4.50   | 43.18  | 10.21  |
| V172 | 0.07   | 23.54  | 70.67  | 0.00   | 0.00   | 0.00   |
| V173 | 177.93 | 2.42   | 0.02   | 10.16  | 149.09 | 280.88 |
| V174 | 13.51  | 1.19   | 0.42   | 4.37   | 1.20   | 14.75  |
| V175 | 32.92  | 23.57  | 1.10   | 17.80  | 29.39  | 17.49  |
| V176 | 108.55 | 47.91  | 15.34  | 0.00   | 63.68  | 0.03   |
| V177 | 296.11 | 3.87   | 167.74 | 19.26  | 306.78 | 3.09   |
| V178 | 0.01   | 0.01   | 0.01   | 0.00   | 0.47   | 19.07  |
| V179 | 0.73   | 0.00   | 0.59   | 0.00   | 0.06   | 13.26  |
| V180 | 0.01   | 0.01   | 0.11   | 0.00   | 0.00   | 5.70   |
| V181 | 0.00   | 0.01   | 0.01   | 0.00   | 0.00   | 58.36  |
| V182 | 0.98   | 0.01   | 0.00   | 0.06   | 0.02   | 0.10   |
| V183 | 0.00   | 0.00   | 0.00   | 0.00   | 0.00   | 27.28  |
| V184 | 0.00   | 0.03   | 0.00   | 0.00   | 0.00   | 0.01   |
| V185 | 0.00   | 0.15   | 0.30   | 0.17   | 0.00   | 0.01   |
| V186 | 0.00   | 0.92   | 0.03   | 0.00   | 0.02   | 0.01   |
| V187 | 0.00   | 0.04   | 0.03   | 0.01   | 0.03   | 0.03   |
| V188 | 0.02   | 0.00   | 0.35   | 0.00   | 0.04   | 0.26   |
| V189 | 0.01   | 0.00   | 0.06   | 0.00   | 0.35   | 0.00   |
| V190 | 0.33   | 0.00   | 0.08   | 0.06   | 0.00   | 0.08   |
| V191 | 0.00   | 0.04   | 0.00   | 0.12   | 0.14   | 0.04   |
| V192 | 0.00   | 0.01   | 0.61   | 0.00   | 0.02   | 0.20   |
| V193 | 0.09   | 0.01   | 0.00   | 0.15   | 0.00   | 0.00   |
| V194 | 0.00   | 0.18   | 0.01   | 0.00   | 0.13   | 0.03   |
| V195 | 0.01   | 0.01   | 0.16   | 0.23   | 0.00   | 0.06   |
| V196 | 0.00   | 0.17   | 0.00   | 0.04   | 0.02   | 0.02   |
| V197 | 0.03   | 0.18   | 0.01   | 0.00   | 0.05   | 0.00   |
| V198 | 0.05   | 3.71   | 0.12   | 0.65   | 0.00   | 0.03   |
| V199 | 0.04   | 1.48   | 0.01   | 0.40   | 0.00   | 0.01   |
| V200 | 0.83   | 0.09   | 0.03   | 0.00   | 0.14   | 0.02   |
| V201 | 0.00   | 3.93   | 0.02   | 0.90   | 0.18   | 0.08   |

---

**Table S6.** The reorganization energy (cm<sup>-1</sup>) between S<sub>1</sub> and T<sub>1</sub> minima vs each frequency of the title compound by NMA method with Cartesian coordinate

| .               | In vacuum                      |                                | In toluene                     |                                | In cluster                     |                                |
|-----------------|--------------------------------|--------------------------------|--------------------------------|--------------------------------|--------------------------------|--------------------------------|
|                 | S <sub>1</sub> →T <sub>1</sub> | T <sub>1</sub> →S <sub>1</sub> | S <sub>1</sub> →T <sub>1</sub> | T <sub>1</sub> →S <sub>1</sub> | S <sub>1</sub> →T <sub>1</sub> | T <sub>1</sub> →S <sub>1</sub> |
| v <sub>1</sub>  | 1.6                            | 7.5                            | 5.1                            | 13.8                           | 29.9                           | 14.7                           |
| v <sub>2</sub>  | 22.2                           | 12.0                           | 11.2                           | 1.3                            | 8.1                            | 0.0                            |
| v <sub>3</sub>  | 50.2                           | 71.6                           | 20.9                           | 4.8                            | 0.8                            | 0.0                            |
| v <sub>4</sub>  | 6.6                            | 28.3                           | 0.9                            | 133.8                          | 0.1                            | 1.6                            |
| v <sub>5</sub>  | 32.9                           | 76.2                           | 5.5                            | 101.9                          | 14.6                           | 5.9                            |
| v <sub>6</sub>  | 412.9                          | 6.2                            | 308.8                          | 16.4                           | 0.9                            | 0.0                            |
| v <sub>7</sub>  | 174.0                          | 13.8                           | 71.0                           | 1.0                            | 0.0                            | 0.7                            |
| v <sub>8</sub>  | 297.3                          | 11.3                           | 126.3                          | 10.2                           | 2.2                            | 2.6                            |
| v <sub>9</sub>  | 19.9                           | 10.7                           | 0.0                            | 2.8                            | 0.0                            | 6.7                            |
| v <sub>10</sub> | 82.1                           | 5.2                            | 32.1                           | 0.1                            | 50.6                           | 34.9                           |
| v <sub>11</sub> | 29.0                           | 1.9                            | 11.5                           | 0.3                            | 84.2                           | 12.8                           |
| v <sub>12</sub> | 21.3                           | 34.8                           | 11.1                           | 17.2                           | 2.0                            | 41.5                           |
| v <sub>13</sub> | 50.6                           | 1.1                            | 16.8                           | 1.7                            | 1.0                            | 88.1                           |
| v <sub>14</sub> | 56.3                           | 44.3                           | 25.5                           | 0.0                            | 22.8                           | 0.0                            |
| v <sub>15</sub> | 17.0                           | 3.7                            | 9.8                            | 9.8                            | 12.8                           | 88.6                           |
| v <sub>16</sub> | 26.1                           | 2.1                            | 30.8                           | 3.1                            | 44.4                           | 1.2                            |
| v <sub>17</sub> | 22.1                           | 2.9                            | 13.4                           | 6.0                            | 0.4                            | 6.9                            |
| v <sub>18</sub> | 6.6                            | 5.0                            | 4.2                            | 2.2                            | 5.2                            | 6.5                            |
| v <sub>19</sub> | 2.3                            | 1.6                            | 0.6                            | 0.0                            | 2.7                            | 38.4                           |
| v <sub>20</sub> | 6.3                            | 33.9                           | 9.9                            | 16.1                           | 1.4                            | 7.8                            |
| v <sub>21</sub> | 0.0                            | 6.5                            | 0.9                            | 7.6                            | 91.7                           | 85.5                           |
| v <sub>22</sub> | 5.0                            | 5.1                            | 3.4                            | 0.6                            | 32.1                           | 0.8                            |
| v <sub>23</sub> | 10.1                           | 2.4                            | 6.2                            | 0.0                            | 7.3                            | 4.4                            |
| v <sub>24</sub> | 3.7                            | 1.4                            | 0.0                            | 1.5                            | 6.7                            | 0.5                            |
| v <sub>25</sub> | 0.0                            | 4.6                            | 0.1                            | 2.3                            | 0.6                            | 0.0                            |
| v <sub>26</sub> | 0.8                            | 1.2                            | 0.3                            | 0.1                            | 4.5                            | 1.8                            |
| v <sub>27</sub> | 28.2                           | 0.3                            | 12.0                           | 2.0                            | 0.1                            | 0.1                            |
| v <sub>28</sub> | 14.4                           | 22.9                           | 1.5                            | 14.3                           | 1.5                            | 0.2                            |
| v <sub>29</sub> | 0.7                            | 3.7                            | 0.3                            | 0.2                            | 0.0                            | 0.0                            |
| v <sub>30</sub> | 0.0                            | 6.6                            | 0.0                            | 1.4                            | 1.9                            | 4.1                            |
| v <sub>31</sub> | 9.2                            | 0.2                            | 1.8                            | 0.2                            | 0.0                            | 2.3                            |
| v <sub>32</sub> | 6.2                            | 30.4                           | 10.0                           | 1.7                            | 52.0                           | 18.3                           |
| v <sub>33</sub> | 0.0                            | 1.1                            | 1.9                            | 19.7                           | 52.8                           | 57.8                           |
| v <sub>34</sub> | 14.6                           | 1.0                            | 9.7                            | 48.3                           | 11.9                           | 7.8                            |
| v <sub>35</sub> | 0.1                            | 235.8                          | 1.1                            | 73.9                           | 1.1                            | 12.5                           |
| v <sub>36</sub> | 12.3                           | 0.0                            | 7.9                            | 1.6                            | 0.0                            | 0.0                            |
| v <sub>37</sub> | 1.6                            | 0.0                            | 0.6                            | 0.7                            | 3.7                            | 0.7                            |
| v <sub>38</sub> | 2.3                            | 16.8                           | 1.4                            | 3.9                            | 0.1                            | 0.0                            |
| v <sub>39</sub> | 13.4                           | 0.5                            | 8.7                            | 1.2                            | 2.8                            | 3.7                            |
| v <sub>40</sub> | 4.0                            | 0.0                            | 1.9                            | 0.1                            | 4.2                            | 2.9                            |
| v <sub>41</sub> | 4.9                            | 0.9                            | 3.5                            | 6.9                            | 5.3                            | 14.2                           |
| v <sub>42</sub> | 118.2                          | 28.7                           | 54.7                           | 7.3                            | 10.7                           | 9.8                            |
| v <sub>43</sub> | 22.0                           | 94.3                           | 26.9                           | 43.1                           | 18.6                           | 2.7                            |
| v <sub>44</sub> | 42.4                           | 0.4                            | 5.0                            | 0.5                            | 0.0                            | 17.5                           |
| v <sub>45</sub> | 178.3                          | 203.2                          | 74.7                           | 86.8                           | 17.3                           | 0.1                            |
| v <sub>46</sub> | 410.5                          | 1.9                            | 127.8                          | 9.9                            | 2.7                            | 0.1                            |
| v <sub>47</sub> | 0.1                            | 73.8                           | 0.0                            | 36.1                           | 1.8                            | 0.0                            |
| v <sub>48</sub> | 1.8                            | 0.0                            | 1.8                            | 2.0                            | 0.1                            | 0.2                            |
| v <sub>49</sub> | 0.9                            | 4.1                            | 0.0                            | 0.1                            | 0.5                            | 0.1                            |

|      |        |        |       |       |      |     |
|------|--------|--------|-------|-------|------|-----|
| V50  | 19.2   | 0.1    | 1.8   | 0.0   | 0.8  | 0.8 |
| V51  | 2.6    | 184.5  | 0.1   | 22.6  | 0.2  | 0.0 |
| V52  | 0.0    | 0.1    | 0.0   | 0.0   | 0.1  | 1.8 |
| V53  | 0.0    | 12.1   | 0.0   | 0.1   | 14.4 | 0.1 |
| V54  | 5.5    | 0.9    | 0.8   | 1.3   | 8.2  | 0.0 |
| V55  | 43.8   | 11.9   | 16.8  | 0.2   | 0.0  | 4.9 |
| V56  | 131.8  | 128.3  | 19.8  | 0.0   | 0.0  | 0.8 |
| V57  | 32.8   | 7.2    | 18.2  | 9.9   | 0.0  | 0.0 |
| V58  | 0.4    | 16.5   | 0.1   | 2.9   | 1.4  | 0.9 |
| V59  | 0.1    | 41.0   | 0.1   | 9.9   | 1.5  | 0.1 |
| V60  | 361.6  | 875.8  | 67.8  | 183.1 | 4.1  | 0.0 |
| V61  | 43.4   | 0.2    | 5.6   | 1.2   | 0.2  | 0.0 |
| V62  | 263.5  | 3.0    | 132.6 | 0.0   | 24.8 | 1.4 |
| V63  | 62.7   | 653.0  | 31.1  | 305.6 | 0.0  | 0.9 |
| V64  | 107.9  | 61.4   | 11.6  | 9.0   | 0.6  | 1.3 |
| V65  | 0.9    | 2.7    | 0.1   | 0.0   | 3.3  | 0.6 |
| V66  | 5.6    | 1.0    | 3.0   | 0.2   | 0.0  | 3.1 |
| V67  | 4.1    | 0.0    | 4.0   | 1.1   | 1.1  | 1.9 |
| V68  | 48.1   | 269.6  | 9.0   | 61.5  | 8.5  | 0.3 |
| V69  | 5.2    | 10.1   | 0.9   | 5.4   | 0.0  | 0.3 |
| V70  | 4.2    | 0.0    | 0.9   | 0.0   | 0.2  | 0.2 |
| V71  | 2145.1 | 11.1   | 413.0 | 601.2 | 0.8  | 0.0 |
| V72  | 15.3   | 2850.8 | 3.1   | 34.1  | 24.1 | 0.0 |
| V73  | 0.2    | 0.1    | 0.0   | 0.0   | 0.0  | 0.2 |
| V74  | 0.4    | 1.4    | 0.0   | 0.0   | 0.0  | 0.0 |
| V75  | 1.0    | 195.8  | 1.7   | 0.0   | 2.0  | 0.0 |
| V76  | 0.0    | 0.0    | 2.6   | 26.0  | 1.6  | 0.1 |
| V77  | 16.9   | 86.1   | 0.1   | 3.4   | 0.1  | 0.6 |
| V78  | 16.6   | 33.7   | 2.6   | 89.1  | 0.2  | 0.3 |
| V79  | 226.2  | 8.0    | 33.5  | 4.5   | 10.9 | 2.0 |
| V80  | 192.6  | 12.9   | 130.1 | 31.9  | 0.2  | 0.2 |
| V81  | 1245.3 | 77.2   | 146.8 | 39.1  | 22.9 | 1.6 |
| V82  | 2.8    | 1287.7 | 1.0   | 293.0 | 14.0 | 0.0 |
| V83  | 0.9    | 2.5    | 0.0   | 0.5   | 0.0  | 0.7 |
| V84  | 0.6    | 0.0    | 0.0   | 0.0   | 0.1  | 0.0 |
| V85  | 0.0    | 0.0    | 0.0   | 0.0   | 0.0  | 0.0 |
| V86  | 0.0    | 758.8  | 0.0   | 0.0   | 0.0  | 0.0 |
| V87  | 0.0    | 0.0    | 0.0   | 1.4   | 0.2  | 1.3 |
| V88  | 0.2    | 0.7    | 0.7   | 100.0 | 27.9 | 7.2 |
| V89  | 7.0    | 28.7   | 0.7   | 4.0   | 0.0  | 3.6 |
| V90  | 32.4   | 0.6    | 4.2   | 343.7 | 0.2  | 0.3 |
| V91  | 2.6    | 0.0    | 2.6   | 0.0   | 7.2  | 2.9 |
| V92  | 0.2    | 1055.8 | 0.1   | 0.0   | 0.7  | 0.0 |
| V93  | 819.3  | 4.6    | 180.3 | 64.4  | 0.3  | 0.0 |
| V94  | 0.4    | 165.5  | 0.0   | 0.2   | 1.8  | 0.0 |
| V95  | 3.4    | 0.0    | 0.1   | 0.0   | 0.0  | 0.0 |
| V96  | 0.4    | 37.8   | 0.5   | 12.5  | 0.1  | 0.0 |
| V97  | 0.1    | 0.0    | 14.3  | 0.0   | 1.8  | 0.0 |
| V98  | 17.1   | 168.7  | 68.7  | 0.1   | 0.1  | 0.3 |
| V99  | 501.3  | 0.0    | 5.2   | 0.5   | 0.0  | 0.0 |
| V100 | 0.0    | 0.2    | 0.0   | 31.0  | 0.0  | 0.2 |
| V101 | 1.2    | 0.4    | 1.7   | 0.0   | 3.1  | 0.0 |
| V102 | 11.8   | 3.6    | 0.0   | 1.1   | 14.4 | 0.0 |
| V103 | 0.0    | 0.4    | 0.0   | 0.0   | 0.0  | 0.0 |

|      |       |        |       |       |       |       |
|------|-------|--------|-------|-------|-------|-------|
| V104 | 1.3   | 6.5    | 0.1   | 0.0   | 0.0   | 0.0   |
| V105 | 0.6   | 0.0    | 0.6   | 0.0   | 0.6   | 0.5   |
| V106 | 46.4  | 0.2    | 10.5  | 0.0   | 0.7   | 2.4   |
| V107 | 1.3   | 0.2    | 0.0   | 0.0   | 3.3   | 8.9   |
| V108 | 7.9   | 48.9   | 6.6   | 4.2   | 19.1  | 0.7   |
| V109 | 777.4 | 287.9  | 172.6 | 63.8  | 3.0   | 1.9   |
| V110 | 239.1 | 197.8  | 24.6  | 55.8  | 2.9   | 0.5   |
| V111 | 23.5  | 259.6  | 4.9   | 65.3  | 4.4   | 0.0   |
| V112 | 18.8  | 49.5   | 2.2   | 18.3  | 10.2  | 3.4   |
| V113 | 114.7 | 196.0  | 15.3  | 80.0  | 30.9  | 0.1   |
| V114 | 9.1   | 2.8    | 0.8   | 0.6   | 1.0   | 3.0   |
| V115 | 0.5   | 130.7  | 0.7   | 131.5 | 1.4   | 1.0   |
| V116 | 150.0 | 4.4    | 18.0  | 67.0  | 7.0   | 62.3  |
| V117 | 0.0   | 474.7  | 3.0   | 1.4   | 55.9  | 1.8   |
| V118 | 14.2  | 67.8   | 3.1   | 39.8  | 3.5   | 1.9   |
| V119 | 98.9  | 57.5   | 24.9  | 5.4   | 7.6   | 10.4  |
| V120 | 96.0  | 3.2    | 55.8  | 0.0   | 17.3  | 19.7  |
| V121 | 56.4  | 235.0  | 12.7  | 78.7  | 8.9   | 7.2   |
| V122 | 0.7   | 42.4   | 0.1   | 6.1   | 3.4   | 4.4   |
| V123 | 32.0  | 5.4    | 1.6   | 0.5   | 20.2  | 2.8   |
| V124 | 6.0   | 0.0    | 0.9   | 0.0   | 0.6   | 0.2   |
| V125 | 88.5  | 9.0    | 14.5  | 0.4   | 0.2   | 0.1   |
| V126 | 11.0  | 6.3    | 0.9   | 0.2   | 5.1   | 4.2   |
| V127 | 22.7  | 19.1   | 15.9  | 5.3   | 1.1   | 0.1   |
| V128 | 80.8  | 111.5  | 11.2  | 17.2  | 0.7   | 1.1   |
| V129 | 195.7 | 260.1  | 39.3  | 209.8 | 3.8   | 23.1  |
| V130 | 835.1 | 1154.1 | 18.9  | 386.9 | 63.1  | 11.6  |
| V131 | 181.3 | 803.3  | 49.1  | 43.1  | 1.1   | 29.5  |
| V132 | 0.6   | 12.5   | 3.3   | 10.0  | 12.4  | 0.0   |
| V133 | 29.3  | 359.7  | 1.3   | 2.3   | 34.1  | 20.6  |
| V134 | 10.8  | 47.4   | 33.2  | 63.9  | 150.7 | 77.8  |
| V135 | 1.1   | 24.7   | 0.0   | 0.2   | 2.6   | 0.0   |
| V136 | 29.8  | 2.3    | 2.7   | 0.2   | 0.5   | 191.9 |
| V137 | 3.0   | 14.9   | 1.6   | 17.4  | 14.3  | 22.9  |
| V138 | 24.8  | 58.9   | 21.3  | 14.5  | 4.6   | 0.7   |
| V139 | 0.4   | 126.4  | 0.0   | 0.1   | 1.1   | 0.0   |
| V140 | 1.4   | 0.8    | 0.5   | 47.8  | 7.8   | 0.0   |
| V141 | 21.2  | 1.7    | 11.5  | 35.9  | 13.1  | 5.5   |
| V142 | 5.8   | 1.7    | 0.0   | 3.8   | 142.1 | 0.0   |
| V143 | 0.2   | 0.2    | 1.7   | 0.5   | 0.0   | 20.6  |
| V144 | 37.4  | 36.9   | 16.4  | 7.0   | 0.9   | 82.9  |
| V145 | 42.6  | 52.1   | 42.5  | 17.3  | 0.0   | 1.5   |
| V146 | 34.3  | 13.9   | 37.2  | 55.0  | 176.9 | 34.7  |
| V147 | 46.0  | 212.5  | 6.9   | 2.1   | 119.6 | 24.5  |
| V148 | 24.5  | 226.4  | 12.4  | 15.3  | 3.5   | 19.2  |
| V149 | 0.0   | 42.3   | 0.2   | 2.2   | 15.3  | 8.3   |
| V150 | 85.3  | 2.9    | 57.7  | 0.1   | 8.5   | 22.9  |
| V151 | 2.7   | 0.1    | 0.7   | 0.0   | 4.5   | 7.9   |
| V152 | 3.5   | 54.0   | 0.4   | 30.0  | 2.0   | 0.3   |
| V153 | 4.1   | 18.4   | 0.2   | 4.2   | 5.1   | 2.1   |
| V154 | 0.7   | 0.2    | 1.2   | 0.1   | 0.0   | 1.9   |
| V155 | 0.4   | 0.6    | 0.0   | 0.1   | 3.0   | 5.5   |
| V156 | 5.3   | 0.4    | 2.8   | 0.0   | 0.0   | 0.2   |
| V157 | 3.3   | 0.4    | 0.4   | 0.0   | 3.6   | 0.0   |



|      |        |        |       |       |       |       |
|------|--------|--------|-------|-------|-------|-------|
| V158 | 0.8    | 13.8   | 0.3   | 10.8  | 14.7  | 0.2   |
| V159 | 25.6   | 10.6   | 3.3   | 1.9   | 6.8   | 23.6  |
| V160 | 9.7    | 19.4   | 5.0   | 3.9   | 6.8   | 3.9   |
| V161 | 9.6    | 4.5    | 9.0   | 9.8   | 40.7  | 27.5  |
| V162 | 16.5   | 2.1    | 12.2  | 0.5   | 3.1   | 0.0   |
| V163 | 0.0    | 0.3    | 1.7   | 1.0   | 20.4  | 2.2   |
| V164 | 279.0  | 12.2   | 195.1 | 6.6   | 31.5  | 78.9  |
| V165 | 3.4    | 46.1   | 5.1   | 60.5  | 10.2  | 20.0  |
| V166 | 124.5  | 281.5  | 23.2  | 19.1  | 0.4   | 116.4 |
| V167 | 12.2   | 14.0   | 13.7  | 56.5  | 272.8 | 0.2   |
| V168 | 23.5   | 37.9   | 0.4   | 0.4   | 15.2  | 19.0  |
| V169 | 8.7    | 15.7   | 13.2  | 0.0   | 17.0  | 14.2  |
| V170 | 105.7  | 15.4   | 133.8 | 0.2   | 0.0   | 79.7  |
| V171 | 6.8    | 2.4    | 0.3   | 0.4   | 3.2   | 43.3  |
| V172 | 1.8    | 2.3    | 91.5  | 0.2   | 19.9  | 0.0   |
| V173 | 186.9  | 11.4   | 0.1   | 24.6  | 13.0  | 146.6 |
| V174 | 1.0    | 26.4   | 0.1   | 24.0  | 5.8   | 1.2   |
| V175 | 53.4   | 59.2   | 12.3  | 67.3  | 61.4  | 30.8  |
| V176 | 242.5  | 218.2  | 38.5  | 1.5   | 0.0   | 61.6  |
| V177 | 6.1    | 137.5  | 6.5   | 102.4 | 29.4  | 274.1 |
| V178 | 20.0   | 17.1   | 8.3   | 6.8   | 0.0   | 2.2   |
| V179 | 23.4   | 0.0    | 5.3   | 0.0   | 0.0   | 0.1   |
| V180 | 0.0    | 0.0    | 0.0   | 0.7   | 0.0   | 0.0   |
| V181 | 0.3    | 5.8    | 0.1   | 0.0   | 0.0   | 0.0   |
| V182 | 46.1   | 0.1    | 0.0   | 0.4   | 0.0   | 0.0   |
| V183 | 0.0    | 6.9    | 1.7   | 0.8   | 0.0   | 0.0   |
| V184 | 14.8   | 0.2    | 0.0   | 0.0   | 0.1   | 0.0   |
| V185 | 0.0    | 0.2    | 2.3   | 18.1  | 0.0   | 1.0   |
| V186 | 0.3    | 109.1  | 9.0   | 0.0   | 0.2   | 0.0   |
| V187 | 11.9   | 2.0    | 2.8   | 0.5   | 0.0   | 0.0   |
| V188 | 170.7  | 0.0    | 134.7 | 4.1   | 0.0   | 0.0   |
| V189 | 3.8    | 0.0    | 11.1  | 0.0   | 0.8   | 4.5   |
| V190 | 725.1  | 32.5   | 17.1  | 60.7  | 0.0   | 0.0   |
| V191 | 0.0    | 119.2  | 1.3   | 8.4   | 0.0   | 0.1   |
| V192 | 0.1    | 40.9   | 248.0 | 0.0   | 1.6   | 0.0   |
| V193 | 187.3  | 158.3  | 0.0   | 4.5   | 0.2   | 0.0   |
| V194 | 64.4   | 1.1    | 0.1   | 0.0   | 0.0   | 0.7   |
| V195 | 36.9   | 1.7    | 8.3   | 0.2   | 0.1   | 0.0   |
| V196 | 0.0    | 0.1    | 0.0   | 22.3  | 0.1   | 0.0   |
| V197 | 7.7    | 10.5   | 0.0   | 0.6   | 0.0   | 0.0   |
| V198 | 1596.1 | 380.0  | 226.1 | 85.1  | 0.0   | 0.0   |
| V199 | 0.1    | 1782.3 | 0.2   | 337.5 | 0.3   | 0.0   |
| V200 | 1883.2 | 1.2    | 311.8 | 0.1   | 0.1   | 0.0   |
| V201 | 0.1    | 1885.3 | 0.0   | 317.8 | 2.2   | 0.3   |

**Table S7.** The reorganization energy (cm<sup>-1</sup>) between S<sub>0</sub> and S<sub>1</sub> minima vs each frequency of the title compound by NMA method with internal coordinate

| .               | In vacuum                      |                                | In toluene                     |                                | In cluster                     |                                |
|-----------------|--------------------------------|--------------------------------|--------------------------------|--------------------------------|--------------------------------|--------------------------------|
|                 | S <sub>0</sub> →S <sub>1</sub> | S <sub>1</sub> →S <sub>0</sub> | S <sub>0</sub> →S <sub>1</sub> | S <sub>1</sub> →S <sub>0</sub> | S <sub>0</sub> →S <sub>1</sub> | S <sub>1</sub> →S <sub>0</sub> |
| v <sub>1</sub>  | 6.52                           | 1.37                           | 69.04                          | 19.24                          | 1.49                           | 1.66                           |
| v <sub>2</sub>  | 4.43                           | 2.81                           | 21.22                          | 3.09                           | 0.80                           | 0.22                           |
| v <sub>3</sub>  | 0.62                           | 0.40                           | 0.22                           | 5.15                           | 0.01                           | 0.04                           |
| v <sub>4</sub>  | 0.06                           | 0.02                           | 0.11                           | 0.15                           | 5.81                           | 4.30                           |
| v <sub>5</sub>  | 0.04                           | 0.05                           | 1.24                           | 0.21                           | 0.53                           | 0.01                           |
| v <sub>6</sub>  | 1.03                           | 2.84                           | 3.41                           | 0.03                           | 1.29                           | 3.26                           |
| v <sub>7</sub>  | 3.65                           | 0.31                           | 3.23                           | 0.00                           | 0.68                           | 1.43                           |
| v <sub>8</sub>  | 3.53                           | 5.20                           | 1.97                           | 0.02                           | 4.34                           | 3.01                           |
| v <sub>9</sub>  | 0.00                           | 0.01                           | 11.19                          | 0.01                           | 1.12                           | 1.01                           |
| v <sub>10</sub> | 0.31                           | 0.63                           | 2.37                           | 0.05                           | 0.14                           | 0.18                           |
| v <sub>11</sub> | 0.17                           | 0.03                           | 0.64                           | 0.46                           | 11.10                          | 17.56                          |
| v <sub>12</sub> | 2.23                           | 2.60                           | 1.89                           | 2.84                           | 16.70                          | 12.38                          |
| v <sub>13</sub> | 9.46                           | 12.78                          | 4.03                           | 11.56                          | 20.54                          | 19.90                          |
| v <sub>14</sub> | 14.45                          | 55.24                          | 57.00                          | 61.88                          | 2.22                           | 0.03                           |
| v <sub>15</sub> | 49.50                          | 0.47                           | 29.55                          | 1.27                           | 3.59                           | 0.00                           |
| v <sub>16</sub> | 0.00                           | 0.15                           | 1.40                           | 0.14                           | 2.28                           | 6.40                           |
| v <sub>17</sub> | 0.31                           | 0.42                           | 0.24                           | 0.50                           | 0.30                           | 0.81                           |
| v <sub>18</sub> | 0.30                           | 0.06                           | 0.90                           | 0.46                           | 0.28                           | 0.29                           |
| v <sub>19</sub> | 0.45                           | 0.32                           | 1.67                           | 0.85                           | 4.12                           | 3.99                           |
| v <sub>20</sub> | 0.01                           | 0.04                           | 0.23                           | 1.13                           | 3.16                           | 2.13                           |
| v <sub>21</sub> | 0.05                           | 0.20                           | 0.06                           | 0.00                           | 0.15                           | 0.17                           |
| v <sub>22</sub> | 2.54                           | 2.65                           | 2.76                           | 8.40                           | 3.12                           | 3.76                           |
| v <sub>23</sub> | 0.39                           | 0.31                           | 0.01                           | 4.36                           | 0.52                           | 0.00                           |
| v <sub>24</sub> | 0.58                           | 0.02                           | 2.11                           | 0.01                           | 2.51                           | 1.76                           |
| v <sub>25</sub> | 2.35                           | 2.18                           | 0.99                           | 1.98                           | 2.98                           | 4.58                           |
| v <sub>26</sub> | 0.03                           | 0.28                           | 0.42                           | 0.47                           | 0.07                           | 0.00                           |
| v <sub>27</sub> | 0.00                           | 3.58                           | 4.28                           | 19.65                          | 0.25                           | 0.20                           |
| v <sub>28</sub> | 3.26                           | 4.50                           | 1.15                           | 3.97                           | 8.06                           | 6.09                           |
| v <sub>29</sub> | 4.08                           | 3.31                           | 5.29                           | 0.16                           | 0.45                           | 0.55                           |
| v <sub>30</sub> | 0.77                           | 0.01                           | 2.71                           | 0.53                           | 0.19                           | 0.00                           |
| v <sub>31</sub> | 24.54                          | 2.92                           | 56.31                          | 11.04                          | 17.39                          | 2.25                           |
| v <sub>32</sub> | 2.98                           | 12.42                          | 0.06                           | 56.40                          | 70.72                          | 46.05                          |
| v <sub>33</sub> | 99.46                          | 20.39                          | 138.81                         | 7.51                           | 29.45                          | 76.83                          |
| v <sub>34</sub> | 6.02                           | 25.44                          | 48.66                          | 19.62                          | 0.62                           | 4.22                           |
| v <sub>35</sub> | 18.14                          | 50.03                          | 16.07                          | 2.64                           | 0.01                           | 0.01                           |
| v <sub>36</sub> | 16.41                          | 0.05                           | 30.19                          | 2.24                           | 0.05                           | 0.02                           |
| v <sub>37</sub> | 0.24                           | 0.00                           | 0.13                           | 0.02                           | 24.57                          | 2.76                           |
| v <sub>38</sub> | 2.36                           | 3.61                           | 0.01                           | 5.73                           | 0.03                           | 5.23                           |
| v <sub>39</sub> | 14.19                          | 20.71                          | 1.42                           | 48.37                          | 0.14                           | 1.33                           |
| v <sub>40</sub> | 0.50                           | 5.26                           | 0.10                           | 14.59                          | 11.94                          | 0.57                           |
| v <sub>41</sub> | 10.50                          | 8.38                           | 1.22                           | 27.05                          | 0.74                           | 0.40                           |
| v <sub>42</sub> | 2.98                           | 97.49                          | 4.31                           | 254.89                         | 7.41                           | 63.73                          |
| v <sub>43</sub> | 7.07                           | 21.43                          | 13.87                          | 25.37                          | 72.47                          | 9.28                           |
| v <sub>44</sub> | 1.83                           | 5.03                           | 22.07                          | 25.66                          | 1.79                           | 9.46                           |
| v <sub>45</sub> | 0.15                           | 80.79                          | 34.62                          | 298.19                         | 4.28                           | 17.42                          |
| v <sub>46</sub> | 0.16                           | 66.38                          | 4.32                           | 258.54                         | 0.38                           | 23.86                          |
| v <sub>47</sub> | 0.97                           | 3.69                           | 0.13                           | 0.97                           | 3.48                           | 3.12                           |
| v <sub>48</sub> | 0.15                           | 3.30                           | 0.01                           | 13.67                          | 0.13                           | 2.93                           |
| v <sub>49</sub> | 0.07                           | 0.03                           | 0.54                           | 0.12                           | 0.01                           | 0.00                           |

|      |       |       |        |        |       |       |
|------|-------|-------|--------|--------|-------|-------|
| V50  | 0.33  | 0.70  | 2.23   | 0.00   | 0.46  | 0.65  |
| V51  | 0.02  | 0.03  | 0.01   | 0.07   | 0.02  | 0.00  |
| V52  | 0.04  | 0.00  | 0.51   | 0.08   | 0.02  | 0.05  |
| V53  | 0.17  | 0.30  | 0.25   | 0.02   | 0.52  | 0.46  |
| V54  | 0.01  | 0.07  | 0.81   | 0.40   | 0.16  | 0.07  |
| V55  | 1.31  | 8.20  | 0.90   | 9.53   | 3.63  | 8.20  |
| V56  | 1.11  | 2.11  | 0.18   | 7.64   | 4.65  | 0.64  |
| V57  | 1.60  | 2.08  | 21.92  | 19.20  | 0.04  | 0.04  |
| V58  | 0.86  | 2.41  | 0.60   | 0.57   | 1.24  | 0.66  |
| V59  | 0.00  | 1.92  | 0.08   | 7.24   | 0.03  | 1.02  |
| V60  | 0.06  | 0.17  | 3.14   | 14.83  | 0.04  | 0.00  |
| V61  | 0.01  | 0.03  | 9.96   | 2.04   | 0.03  | 0.00  |
| V62  | 46.77 | 0.52  | 344.16 | 166.57 | 5.31  | 6.74  |
| V63  | 6.77  | 21.82 | 59.50  | 168.26 | 1.68  | 0.58  |
| V64  | 0.55  | 16.81 | 3.94   | 32.00  | 0.43  | 0.22  |
| V65  | 6.13  | 0.27  | 0.46   | 0.03   | 1.20  | 0.17  |
| V66  | 0.00  | 12.08 | 4.23   | 22.09  | 0.11  | 6.37  |
| V67  | 0.13  | 0.26  | 0.22   | 3.45   | 11.89 | 3.15  |
| V68  | 3.79  | 1.45  | 3.81   | 0.41   | 2.99  | 0.26  |
| V69  | 0.01  | 3.23  | 0.53   | 10.85  | 0.43  | 4.87  |
| V70  | 0.04  | 0.17  | 0.04   | 2.12   | 0.08  | 4.01  |
| V71  | 0.05  | 15.31 | 64.27  | 181.93 | 3.47  | 4.79  |
| V72  | 0.06  | 1.80  | 17.50  | 8.53   | 3.19  | 1.01  |
| V73  | 0.00  | 0.06  | 0.06   | 0.11   | 0.15  | 0.02  |
| V74  | 0.00  | 0.00  | 0.06   | 0.05   | 0.00  | 0.00  |
| V75  | 0.17  | 0.05  | 5.94   | 0.71   | 0.04  | 1.53  |
| V76  | 0.01  | 0.19  | 0.02   | 2.56   | 0.02  | 0.01  |
| V77  | 0.11  | 0.00  | 0.62   | 0.33   | 1.09  | 0.15  |
| V78  | 0.52  | 0.38  | 1.17   | 2.09   | 0.07  | 0.25  |
| V79  | 5.05  | 3.17  | 12.65  | 0.70   | 5.54  | 4.10  |
| V80  | 5.58  | 2.73  | 28.69  | 64.02  | 9.49  | 0.06  |
| V81  | 0.28  | 20.69 | 0.11   | 57.45  | 0.00  | 11.93 |
| V82  | 0.01  | 0.15  | 0.01   | 0.00   | 0.06  | 0.04  |
| V83  | 0.00  | 0.00  | 0.04   | 0.26   | 0.04  | 0.50  |
| V84  | 0.00  | 0.08  | 0.02   | 0.43   | 0.57  | 0.01  |
| V85  | 0.03  | 0.07  | 0.03   | 0.09   | 0.09  | 0.04  |
| V86  | 0.01  | 0.00  | 0.08   | 0.00   | 0.03  | 0.26  |
| V87  | 0.00  | 0.01  | 0.00   | 0.00   | 0.00  | 7.09  |
| V88  | 0.02  | 5.90  | 0.03   | 7.32   | 0.01  | 0.33  |
| V89  | 0.19  | 11.64 | 0.97   | 8.65   | 16.02 | 12.65 |
| V90  | 10.35 | 3.61  | 0.90   | 0.24   | 0.53  | 0.97  |
| V91  | 0.00  | 0.87  | 0.00   | 6.69   | 0.09  | 1.99  |
| V92  | 0.17  | 0.00  | 2.92   | 0.03   | 0.05  | 0.00  |
| V93  | 1.15  | 13.96 | 1.58   | 107.89 | 14.11 | 2.83  |
| V94  | 13.70 | 0.00  | 24.20  | 0.01   | 1.59  | 1.32  |
| V95  | 0.00  | 0.01  | 1.22   | 0.05   | 0.36  | 0.00  |
| V96  | 0.10  | 1.15  | 0.07   | 1.29   | 2.97  | 0.05  |
| V97  | 0.05  | 0.07  | 0.00   | 7.62   | 0.25  | 0.17  |
| V98  | 0.38  | 0.40  | 0.66   | 30.19  | 0.00  | 15.27 |
| V99  | 0.00  | 20.32 | 0.00   | 5.24   | 6.75  | 0.20  |
| V100 | 0.09  | 0.01  | 13.04  | 0.06   | 8.76  | 11.02 |
| V101 | 16.66 | 0.00  | 0.00   | 0.33   | 0.00  | 0.00  |
| V102 | 0.32  | 0.99  | 0.01   | 0.04   | 0.06  | 0.03  |
| V103 | 0.07  | 0.00  | 0.00   | 0.00   | 0.00  | 0.13  |

|      |        |       |        |        |        |       |
|------|--------|-------|--------|--------|--------|-------|
| V104 | 0.02   | 0.03  | 0.10   | 0.08   | 0.09   | 0.00  |
| V105 | 0.19   | 0.03  | 0.06   | 1.45   | 0.30   | 0.39  |
| V106 | 0.24   | 3.98  | 30.82  | 44.71  | 1.49   | 0.04  |
| V107 | 15.28  | 2.60  | 31.31  | 0.41   | 0.40   | 8.45  |
| V108 | 0.26   | 53.19 | 15.31  | 120.63 | 7.59   | 4.68  |
| V109 | 0.42   | 1.89  | 57.63  | 100.07 | 5.49   | 4.39  |
| V110 | 0.36   | 13.54 | 33.12  | 27.22  | 1.01   | 4.64  |
| V111 | 0.46   | 0.45  | 0.00   | 8.18   | 0.22   | 0.01  |
| V112 | 0.31   | 0.13  | 4.61   | 2.81   | 0.14   | 0.06  |
| V113 | 0.05   | 0.01  | 4.85   | 8.60   | 0.02   | 0.13  |
| V114 | 0.11   | 0.09  | 1.06   | 0.05   | 0.27   | 0.15  |
| V115 | 1.12   | 0.62  | 3.06   | 2.63   | 1.32   | 3.59  |
| V116 | 9.53   | 1.82  | 77.69  | 3.51   | 3.52   | 6.29  |
| V117 | 0.39   | 0.21  | 0.34   | 17.35  | 4.33   | 0.62  |
| V118 | 2.23   | 0.00  | 6.61   | 0.06   | 0.39   | 9.59  |
| V119 | 1.19   | 25.85 | 0.38   | 41.69  | 5.35   | 6.74  |
| V120 | 6.36   | 8.76  | 20.03  | 65.14  | 40.23  | 4.79  |
| V121 | 33.73  | 0.82  | 5.69   | 7.80   | 0.22   | 51.15 |
| V122 | 0.77   | 67.84 | 0.15   | 62.30  | 0.02   | 0.10  |
| V123 | 0.00   | 0.02  | 6.44   | 1.44   | 0.19   | 0.11  |
| V124 | 0.73   | 0.07  | 1.57   | 0.98   | 22.40  | 0.31  |
| V125 | 0.22   | 9.01  | 0.01   | 34.21  | 23.99  | 1.87  |
| V126 | 0.89   | 1.82  | 3.75   | 9.42   | 1.29   | 16.12 |
| V127 | 20.19  | 6.71  | 16.32  | 31.77  | 2.01   | 1.96  |
| V128 | 1.85   | 3.17  | 0.38   | 15.33  | 3.18   | 0.00  |
| V129 | 0.84   | 40.44 | 20.60  | 30.45  | 0.07   | 40.62 |
| V130 | 6.86   | 4.91  | 61.06  | 0.08   | 0.60   | 1.84  |
| V131 | 1.97   | 0.56  | 9.89   | 73.64  | 0.54   | 5.18  |
| V132 | 4.00   | 4.78  | 3.79   | 8.28   | 1.68   | 0.22  |
| V133 | 22.15  | 0.00  | 21.13  | 0.04   | 26.22  | 2.06  |
| V134 | 15.24  | 0.30  | 0.22   | 2.06   | 6.21   | 1.81  |
| V135 | 15.74  | 3.73  | 14.81  | 10.11  | 32.53  | 3.99  |
| V136 | 11.00  | 11.69 | 2.39   | 40.44  | 26.80  | 1.28  |
| V137 | 21.87  | 15.28 | 16.72  | 31.74  | 0.01   | 4.83  |
| V138 | 0.00   | 2.81  | 0.49   | 0.05   | 0.10   | 7.88  |
| V139 | 0.07   | 0.00  | 0.37   | 0.01   | 0.65   | 0.30  |
| V140 | 5.52   | 0.20  | 5.60   | 3.41   | 3.40   | 2.63  |
| V141 | 0.01   | 6.94  | 0.90   | 15.47  | 33.61  | 13.00 |
| V142 | 71.14  | 13.44 | 70.24  | 4.07   | 0.21   | 0.19  |
| V143 | 1.34   | 0.00  | 13.10  | 3.98   | 28.38  | 42.41 |
| V144 | 16.75  | 45.36 | 15.93  | 43.38  | 18.43  | 59.88 |
| V145 | 1.35   | 56.23 | 0.50   | 40.47  | 132.43 | 0.15  |
| V146 | 134.78 | 0.00  | 105.20 | 5.58   | 15.12  | 58.79 |
| V147 | 1.92   | 74.73 | 1.45   | 107.99 | 1.79   | 19.80 |
| V148 | 22.04  | 50.41 | 30.04  | 67.93  | 12.65  | 48.99 |
| V149 | 18.70  | 17.36 | 21.70  | 13.28  | 13.64  | 8.45  |
| V150 | 1.36   | 13.79 | 0.34   | 17.30  | 30.98  | 6.34  |
| V151 | 16.96  | 25.65 | 13.53  | 28.18  | 7.27   | 34.26 |
| V152 | 18.46  | 4.33  | 24.19  | 1.31   | 0.29   | 0.42  |
| V153 | 0.02   | 0.64  | 0.06   | 0.59   | 2.83   | 1.72  |
| V154 | 1.08   | 0.10  | 1.01   | 0.13   | 1.23   | 1.08  |
| V155 | 0.31   | 3.68  | 1.51   | 2.16   | 1.69   | 9.03  |
| V156 | 0.53   | 6.82  | 0.52   | 0.04   | 0.00   | 0.37  |
| V157 | 4.60   | 0.06  | 13.16  | 0.01   | 15.15  | 5.30  |

|      |        |        |        |        |        |        |
|------|--------|--------|--------|--------|--------|--------|
| V158 | 73.07  | 2.36   | 61.61  | 0.29   | 33.22  | 2.24   |
| V159 | 23.31  | 38.17  | 27.82  | 12.58  | 33.75  | 40.85  |
| V160 | 1.46   | 8.03   | 0.77   | 7.08   | 1.46   | 6.17   |
| V161 | 9.59   | 5.16   | 10.77  | 14.36  | 10.33  | 38.62  |
| V162 | 0.60   | 25.12  | 0.23   | 37.48  | 23.62  | 0.31   |
| V163 | 32.82  | 13.65  | 34.75  | 7.32   | 3.66   | 5.19   |
| V164 | 0.65   | 69.33  | 4.09   | 181.89 | 1.04   | 36.08  |
| V165 | 1.26   | 1.85   | 3.37   | 0.12   | 10.72  | 7.98   |
| V166 | 31.52  | 15.06  | 17.29  | 1.71   | 38.58  | 16.26  |
| V167 | 31.46  | 3.06   | 38.46  | 3.24   | 21.21  | 4.05   |
| V168 | 7.85   | 0.01   | 8.21   | 4.96   | 0.22   | 24.73  |
| V169 | 0.38   | 24.16  | 2.94   | 23.24  | 0.03   | 0.59   |
| V170 | 12.82  | 66.08  | 0.00   | 106.62 | 19.22  | 68.79  |
| V171 | 10.53  | 2.16   | 28.28  | 0.20   | 10.29  | 28.84  |
| V172 | 1.94   | 0.18   | 4.48   | 70.24  | 1.54   | 0.05   |
| V173 | 48.02  | 83.60  | 33.96  | 0.03   | 38.05  | 71.93  |
| V174 | 1.78   | 0.19   | 2.31   | 0.79   | 25.48  | 0.02   |
| V175 | 15.52  | 4.72   | 9.16   | 23.98  | 3.84   | 24.98  |
| V176 | 244.83 | 62.47  | 59.51  | 29.32  | 332.37 | 14.91  |
| V177 | 21.30  | 409.11 | 6.25   | 871.07 | 71.14  | 270.56 |
| V178 | 0.00   | 1.41   | 0.11   | 13.70  | 0.04   | 0.19   |
| V179 | 0.16   | 1.74   | 0.57   | 7.59   | 0.02   | 0.10   |
| V180 | 0.18   | 0.11   | 1.68   | 0.05   | 0.02   | 0.02   |
| V181 | 1.16   | 0.00   | 12.59  | 0.30   | 0.04   | 0.00   |
| V182 | 0.52   | 5.32   | 9.43   | 0.06   | 0.22   | 0.04   |
| V183 | 0.10   | 0.00   | 0.11   | 1.96   | 0.00   | 0.00   |
| V184 | 0.30   | 0.11   | 6.24   | 0.14   | 0.28   | 0.01   |
| V185 | 0.01   | 0.01   | 1.32   | 21.68  | 0.13   | 0.04   |
| V186 | 0.73   | 0.02   | 2.65   | 11.94  | 0.17   | 0.13   |
| V187 | 0.36   | 0.68   | 12.68  | 7.84   | 0.55   | 0.18   |
| V188 | 0.26   | 10.82  | 1.22   | 85.55  | 0.06   | 0.15   |
| V189 | 0.00   | 9.02   | 1.13   | 15.79  | 0.00   | 0.49   |
| V190 | 0.01   | 2.47   | 0.15   | 60.10  | 0.04   | 0.01   |
| V191 | 0.34   | 0.00   | 2.96   | 0.72   | 0.04   | 0.67   |
| V192 | 0.26   | 0.07   | 0.79   | 62.36  | 0.05   | 0.15   |
| V193 | 1.37   | 0.00   | 28.60  | 0.19   | 0.43   | 0.13   |
| V194 | 0.13   | 0.30   | 12.87  | 0.16   | 0.05   | 0.02   |
| V195 | 0.04   | 0.44   | 0.88   | 22.57  | 0.30   | 0.00   |
| V196 | 5.10   | 0.00   | 47.34  | 0.01   | 0.00   | 0.10   |
| V197 | 10.03  | 0.25   | 107.32 | 0.04   | 0.11   | 0.37   |
| V198 | 0.67   | 0.03   | 72.48  | 35.39  | 0.00   | 0.01   |
| V199 | 0.62   | 0.34   | 1.41   | 0.18   | 0.19   | 0.25   |
| V200 | 0.24   | 0.05   | 35.87  | 25.42  | 0.28   | 0.27   |
| V201 | 0.39   | 0.01   | 0.81   | 0.00   | 0.93   | 0.92   |

---
